# Supplementary material
Source: PubMed Central journal article supplement (PMC7547581)
Supplement: mmc1.pdf [file mmc1.pdf]

# **Anti-COVID-19 terpenoid from marine sources: a docking, ADMET and molecular dynamics study**

Nayim Sepay<sup>a,\*</sup>, Aishwarya Sekar<sup>b</sup>, Umesh C Halder<sup>a,\*</sup>, Abdullah Alarifi<sup>c</sup>, Mohd Afzal<sup>c</sup>

<sup>a</sup>*Department of Chemistry, Jadavpur University, Kolkata-70032, India.*

<sup>b</sup>*Department of Bioinformatics, Stella Maris College (Autonomous), Chennai, Tamilnadu-600 086, India.*

<sup>c</sup>*Catalytic Chemistry Research Chair, Department of Chemistry, College of Science, King Saud University, Riyadh 11451, Saudi Arabia.*

## Methods

The study focused on the SARC-CoV-2 M<sup>Pro</sup>, i.e. PDB ID: 5r7y, 5r7z, 5r80, 5r81, 5r82, 5r83, 5r84, 6lu7 and 6y7m for *in silico* studies to find some SARC-CoV-2 M<sup>Pro</sup> inhibitors from a library of natural products. The three dimensional structure of SARC-CoV-2 M<sup>Pro</sup> enzymes were collected from the RCSB website.<sup>1</sup>

### *Density Functional Theory*

The energy minimized structures of all the NPs were obtained with the help of the density functional theory (DFT). The optimization of ground state geometries of the NPs with B3LYP functional at 6-311G level of theory in gaseous state. The job have been performed with the Gaussian 09W Revision D.01 program<sup>2</sup> on the Windows platform.

### *Molecular docking*

Energy minimized structure of all the investigated NPs which was obtained from DFT optimization were used for docking simulations with the SARC-CoV-2 M<sup>Pro</sup> (PDB ID: 6lu7) protein structure. The docking studies was performed using AutoDock 4.2.0 applications through Autodock tools at the Windows platform.<sup>3</sup> The MGL Tools was utilized in the preparation of the structure of the NPs and the proteins in appropriate formats which were required for the calculations. In the case of SARC-CoV-2 M<sup>Pro</sup> enzyme with the NPs, the partial atomic charges (Gasteiger charges) have been allocate after putting hydrogens to all the atoms of the protein as well as the NPs, separately. Here, the NPs structures allowed as flexible moiety and the SARC-CoV-2 M<sup>Pro</sup> enzyme structure kept as rigid during the docking studies. The ten conformers of NPs inside the active site of the SARC-CoV-2 M<sup>Pro</sup> enzyme having minimum potential energy were obtained through subsequent 20 000 precise docking step with 1000 exhaustiveness parameter inside the 60 x 60 x 60 Å<sup>3</sup> grid box using a Lamarckian genetic algorithm.

### *Protein structure modelling.*

The protein crystal structure data of all the SARC-CoV-2 M<sup>Pro</sup> enzymes were downloaded from Protein Data Bank (PDB ID: 5r7y, 5r7z, 5r80, 5r81, 5r82, 5r83, 5r84, 6lu7 and 6y7m). The protein structures utilized in all the further studies were prepared by Discovery studio 2017 R2 client. The pictures of the protein used here was made with MolSoft-ICM browser, Meastro 11.1, Samson core and Discovery studio 2017 R2 client. The SARC-CoV-2 M<sup>Pro</sup> protein-NPs docked complex with lowest potential energy structures also analyzed by the aforesaid software.

### *Molecular Electrostatic Potential (MEP) Analysis*

The energy minimized structures of the NPs gained from DFT were further utilized for MEP calculations. The same functional used for DFT has also been employed to generate the

electrostatic potential map throughout the atomic framework of the NPs molecules. Here, the basis set was 6-31g with the 0.03 iso values. All these calculations were performed on the Windows version of Gaussian 09W software with D1 revision.<sup>2</sup>

### *ADME study*

The SwissADME web server was utilized for all the ADME calculations<sup>4</sup> of the NPs showed top most binding affinity toward SARS-CoV-2 M<sup>pro</sup>. The server have a strong data base to predict physicochemical properties like lipophilicity, water solubility, drug likeness, pharmacokinetics and medicinal properties with high accuracy.

### *Toxicity*

The probability of Cardiac toxicity for all the NPs having high binding score in docking studies were calculated by Pred-hERG which is the only web-accessible computational server for this toxicity.<sup>5</sup> All the other type of toxicity of these NPs and FDA approved anti-viral drugs have been predicted using PROTOX-II.<sup>6</sup> In this case, we have considered the acute toxicity, organ toxicity, toxicological endpoint, nuclear receptor signaling pathways and stress response pathway.

### *Molecular Dynamics simulation*

Understanding the stability of protein upon ligand binding is significantly improved by molecular dynamics simulation studies. Molecular dynamics simulation of the SARS CoV2 Main Protease and the ligand **T3** (from marine sponges) was performed with Groningen Machine for Chemical Simulation (GROMACS) version 2020.2. Topology parameters for protein and ligand were generated With GROMOS96 54a7 force field and Ligand topology was obtained from the PRODRG2 server. The protein -ligand system was embedded in a cubic box of approximate size with periodic boundary conditions using a simple point charge water solvation model (38012 water molecules)<sup>7</sup>. The overall system was neutralized by adding 4 Na<sup>+</sup> ions in solution and the SHAKE algorithm was used to constrain all bond lengths involving hydrogen atoms. Particle Mesh Ewald method with a cutoff of 12 Å was applied to treat the long range electrostatic interactions. The processed system was suitably minimized followed by the NPT and NVT ensemble equilibration steps at a uniform temperature and pressure of 300 K and 1 bar, respectively maintained for each system with Parrinello–Rahman barostat. The trajectories were saved at every 2 fs time step and the production MD simulation of the protein-ligand complex was performed for 95 nanoseconds<sup>8</sup>.

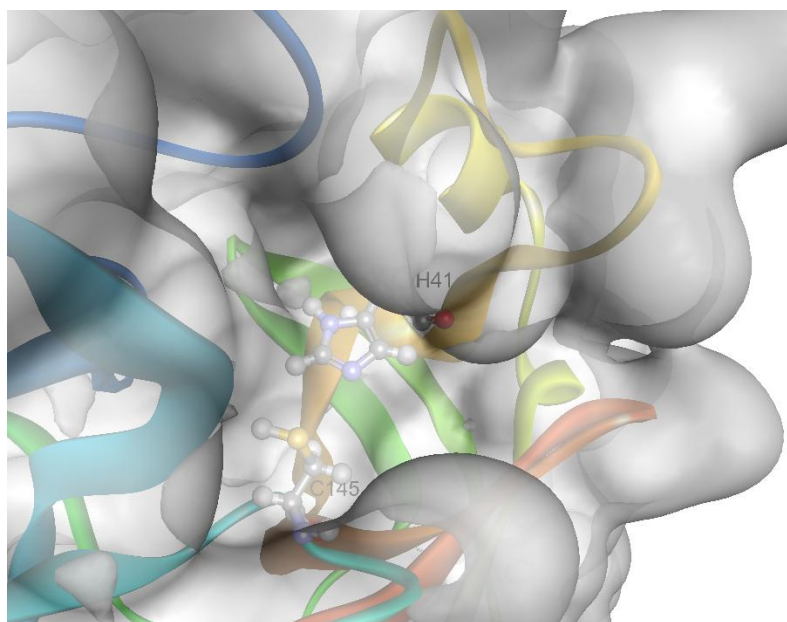

Figure S1: The H41 and C145 amino acid residue inside the active site of SARS-CoV-2 M<sup>pro</sup>.

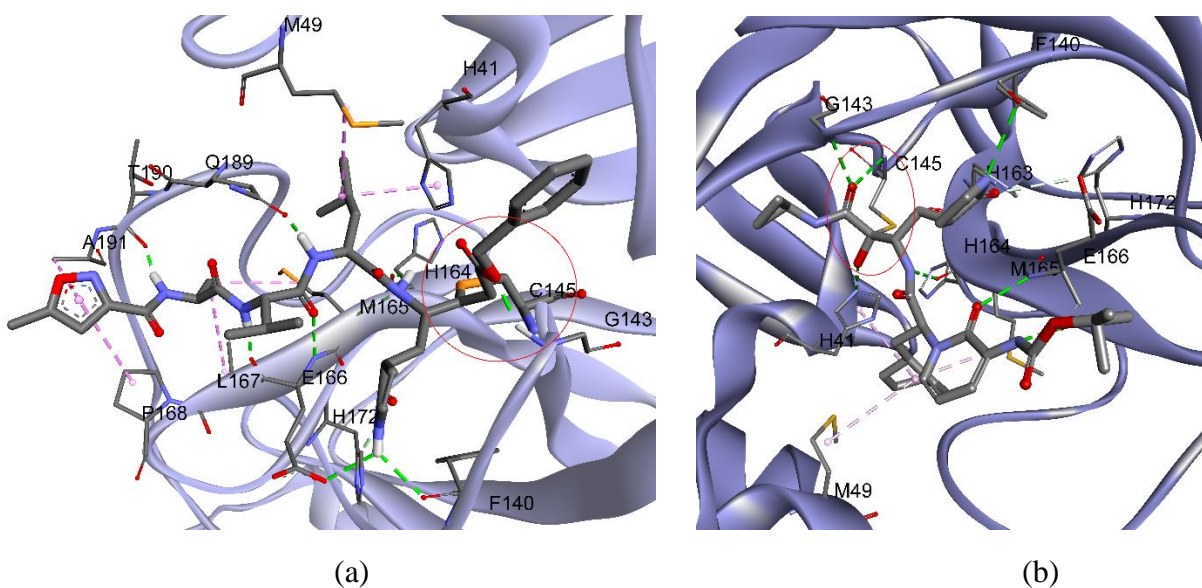

Figure S2: The peptide based ligand attached inside the active site of SARS-CoV-2 M<sup>pro</sup> with a covalent bond by C145 through (a) conjugated addition to  $\alpha,\beta$ -unsaturated ester and (b) nucleophilic addition to active ketone.

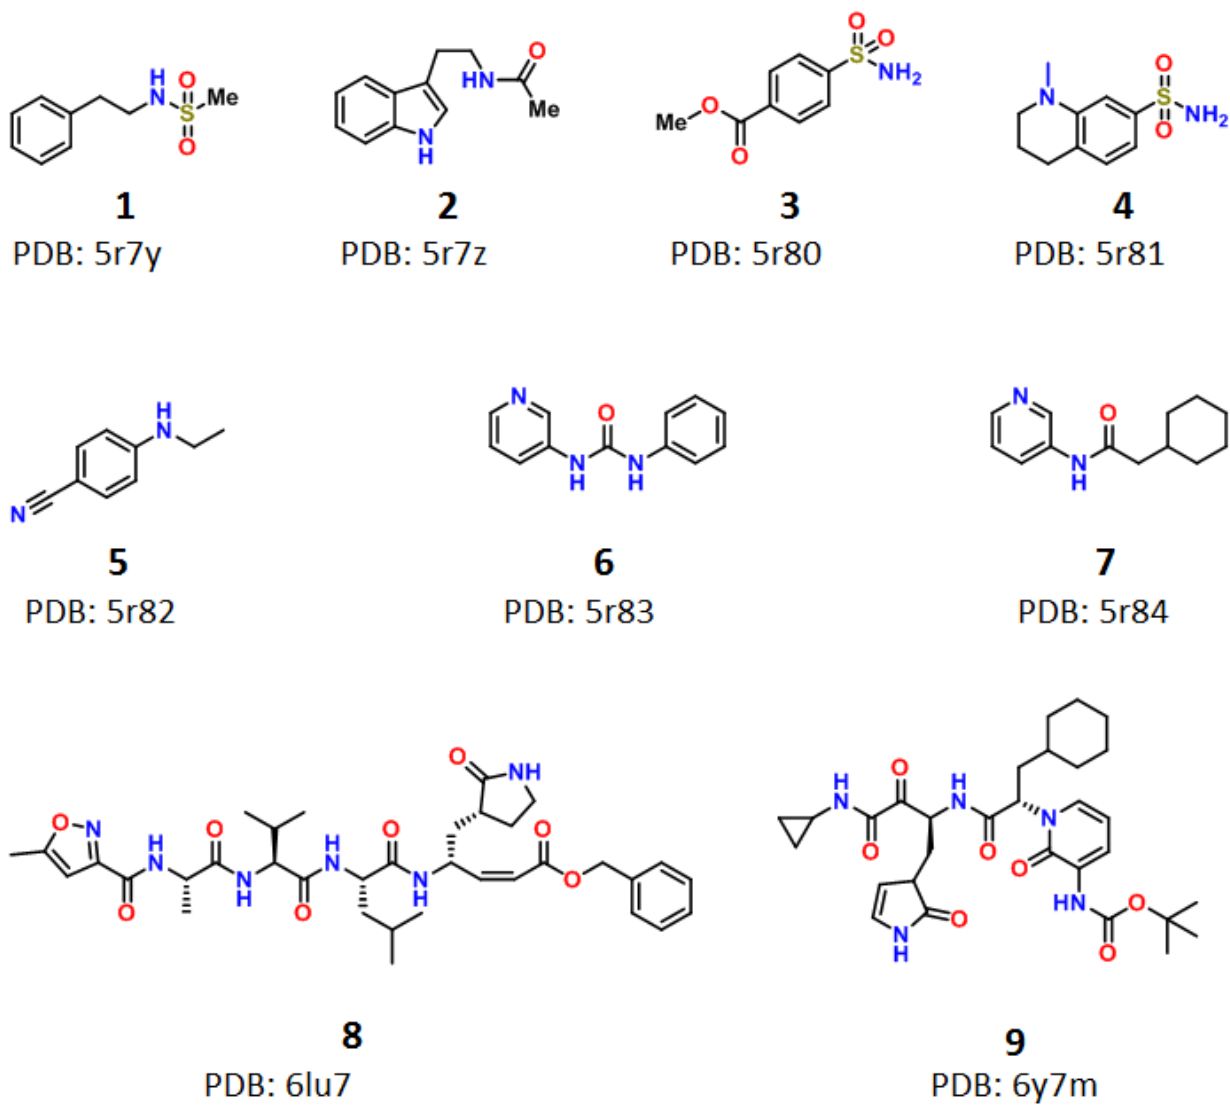

Figure S3: The small ligands found inside the crystal structure of SARS-CoV-2 M<sup>pro</sup>.

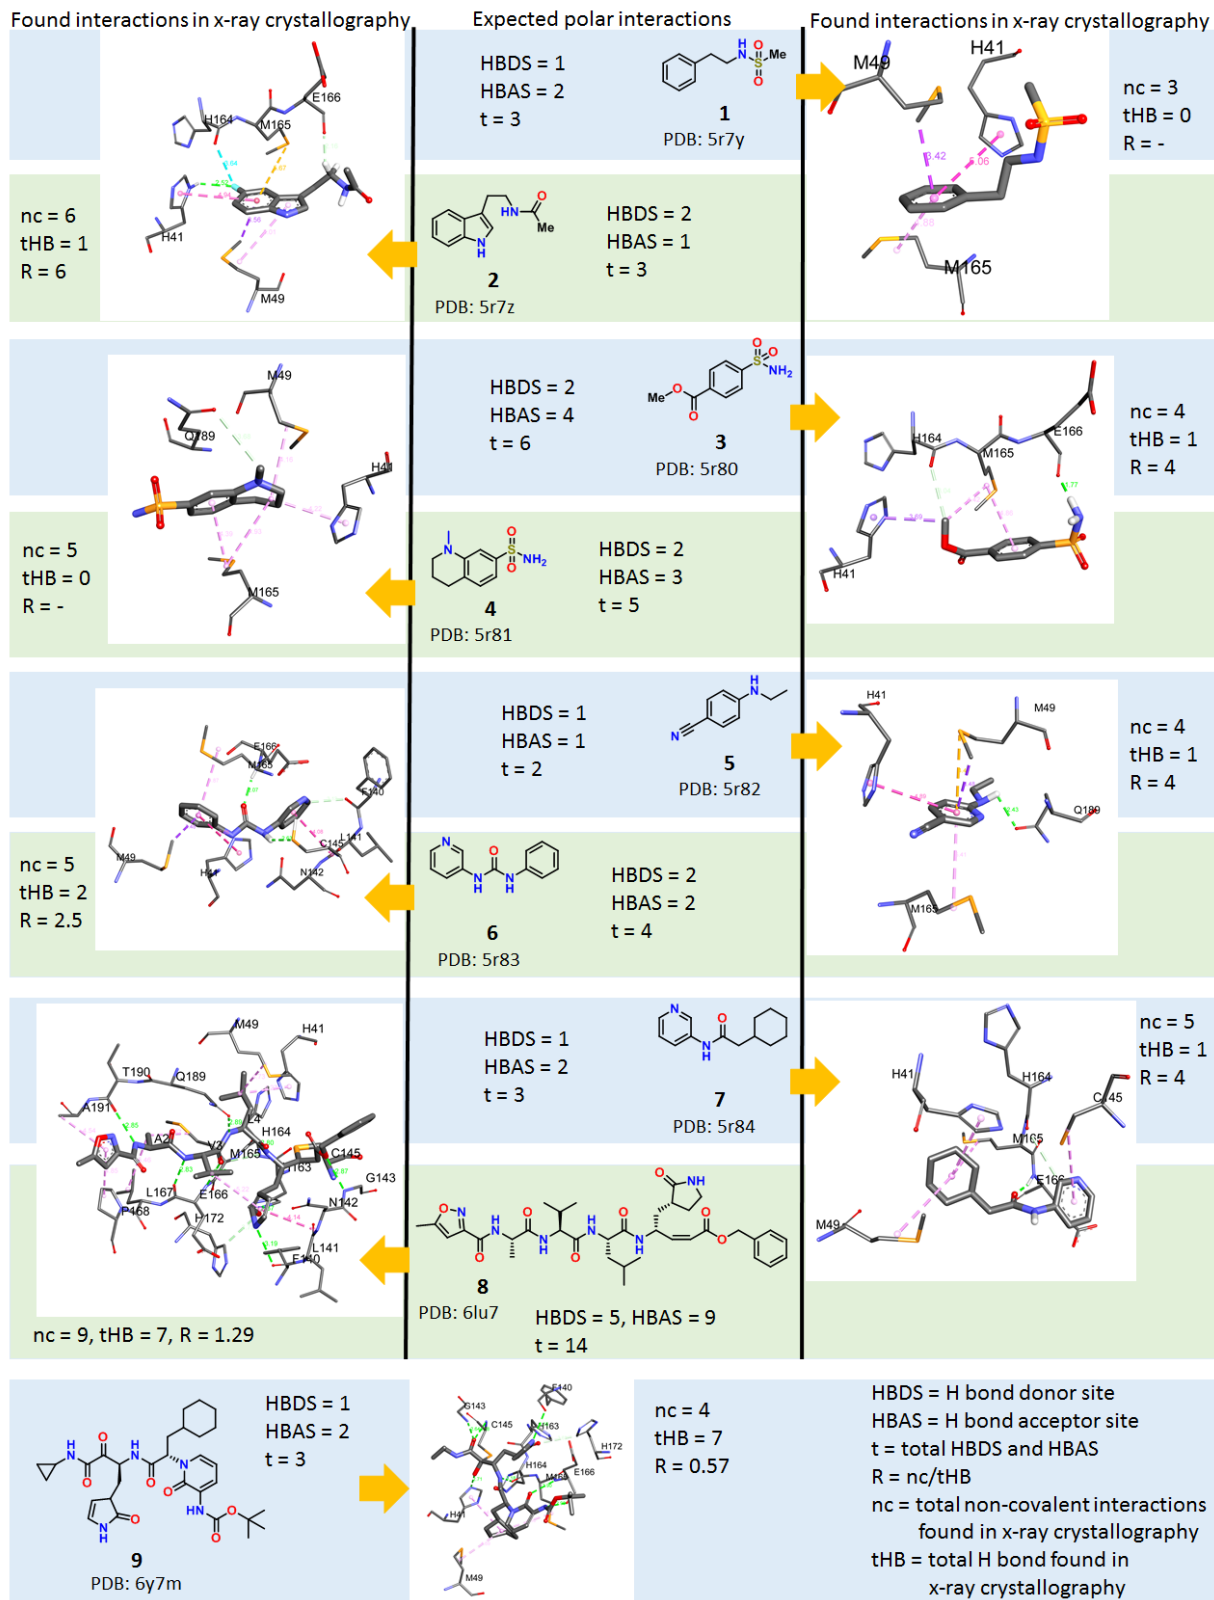

Figure S4: The small ligands-SARC-CoV-2 M<sup>Pro</sup> enzyme interactions found inside the active site of the protein shows hydrophobic preference over hydrophilicity.

## Alkaloids

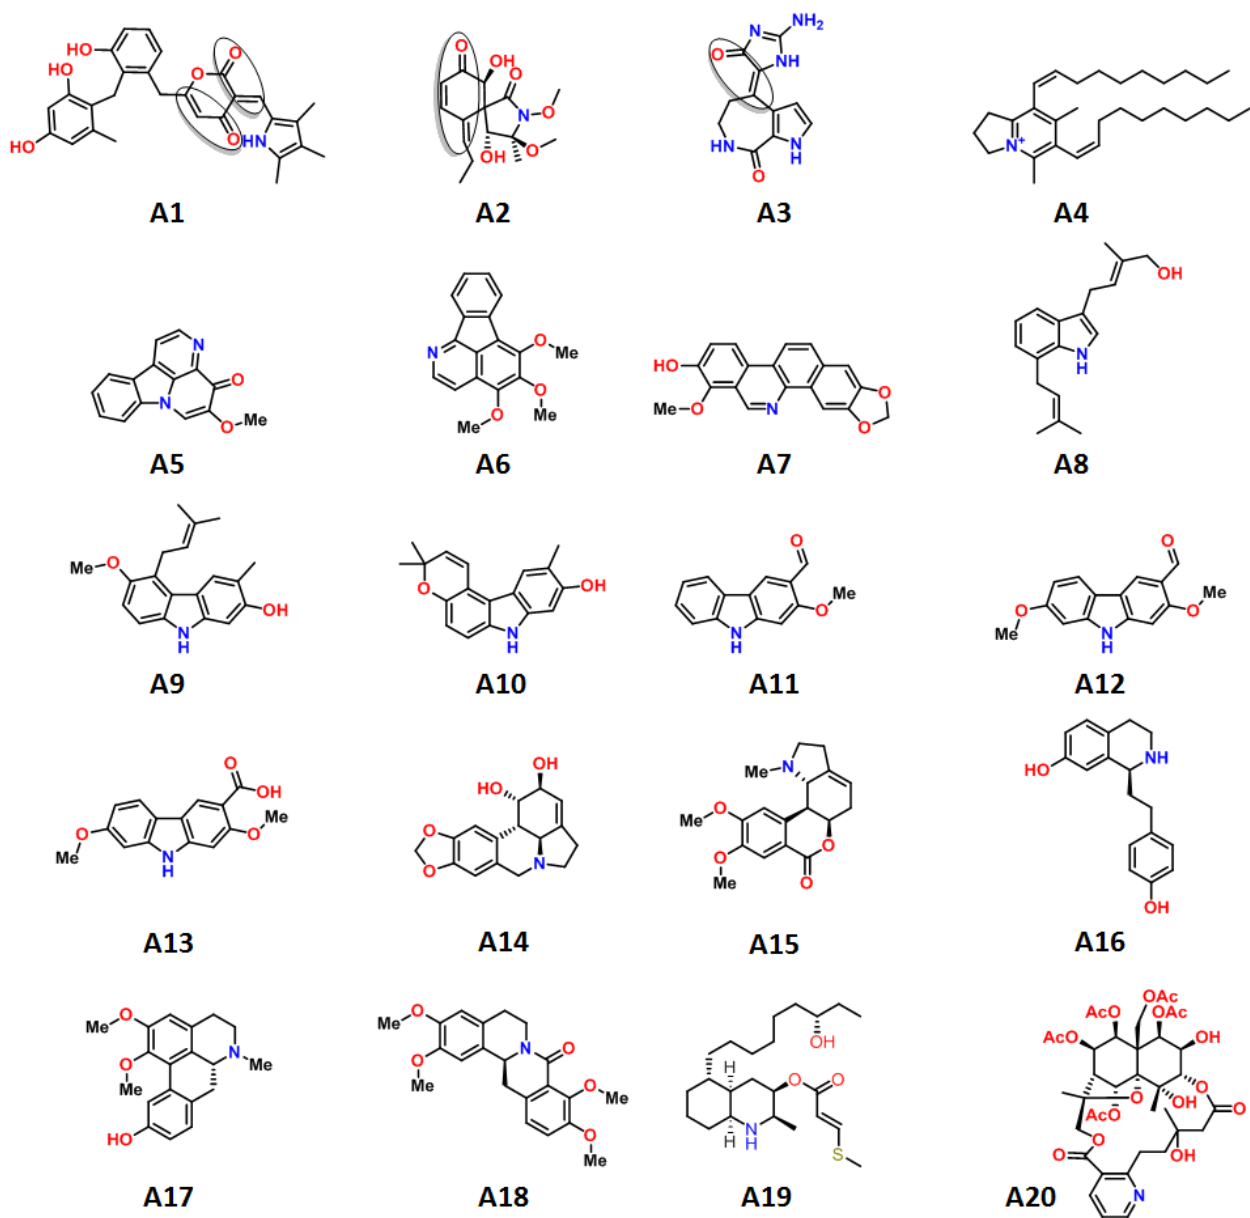

Figure S5: The structures of natural alkaloids **A1-A20**.

## Terpenoids

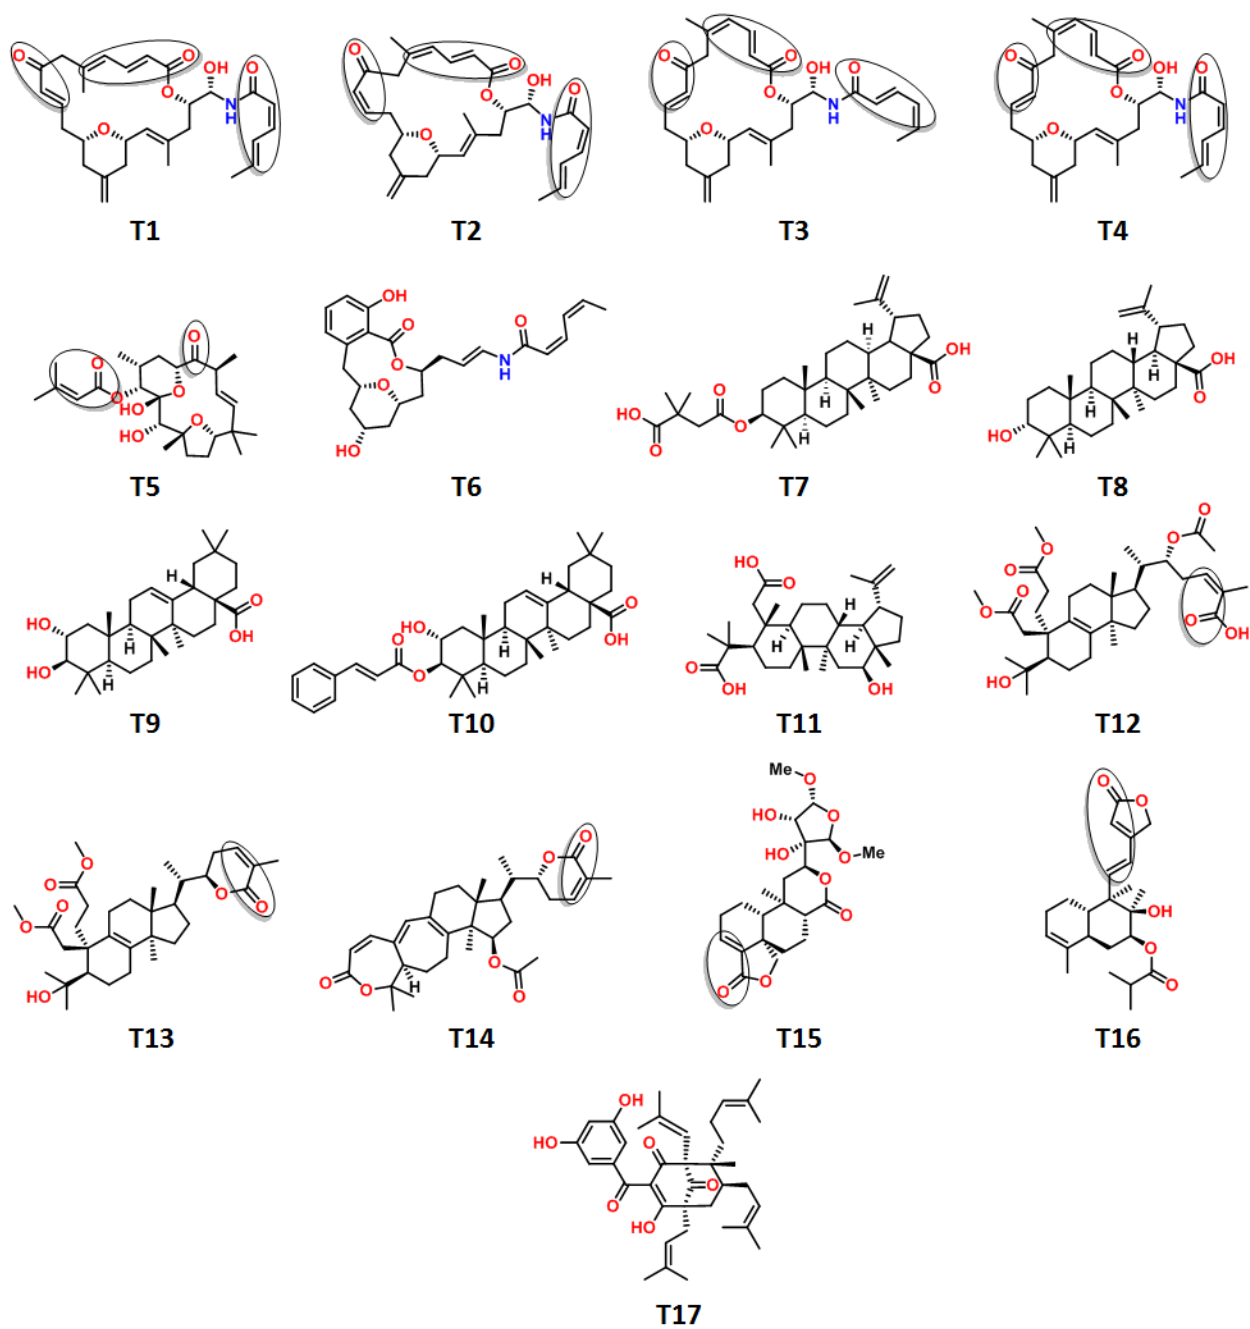

Figure S6: The structures of natural terpenoids **T1-T17**.



## Polyphenols

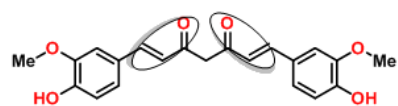

**P1**

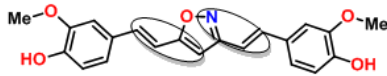

**P2**

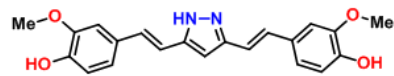

**P3**

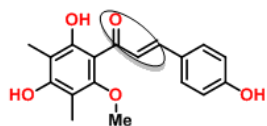

**P4**

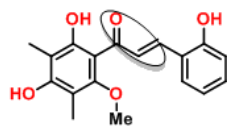

**P5**

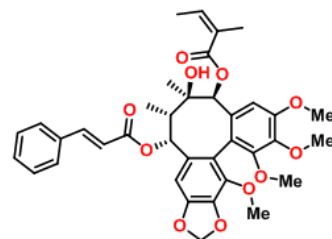

**P6**

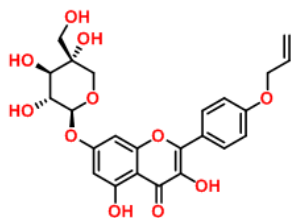

**P7**

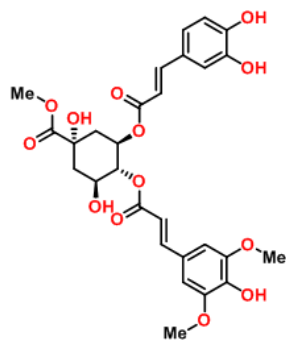

**P8**

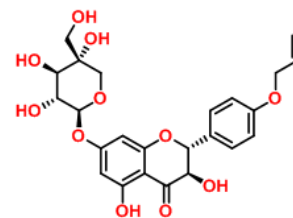

**P9**

Figure S7: The structures of polyphenolic NPs **P1-P9**.

## Peptides

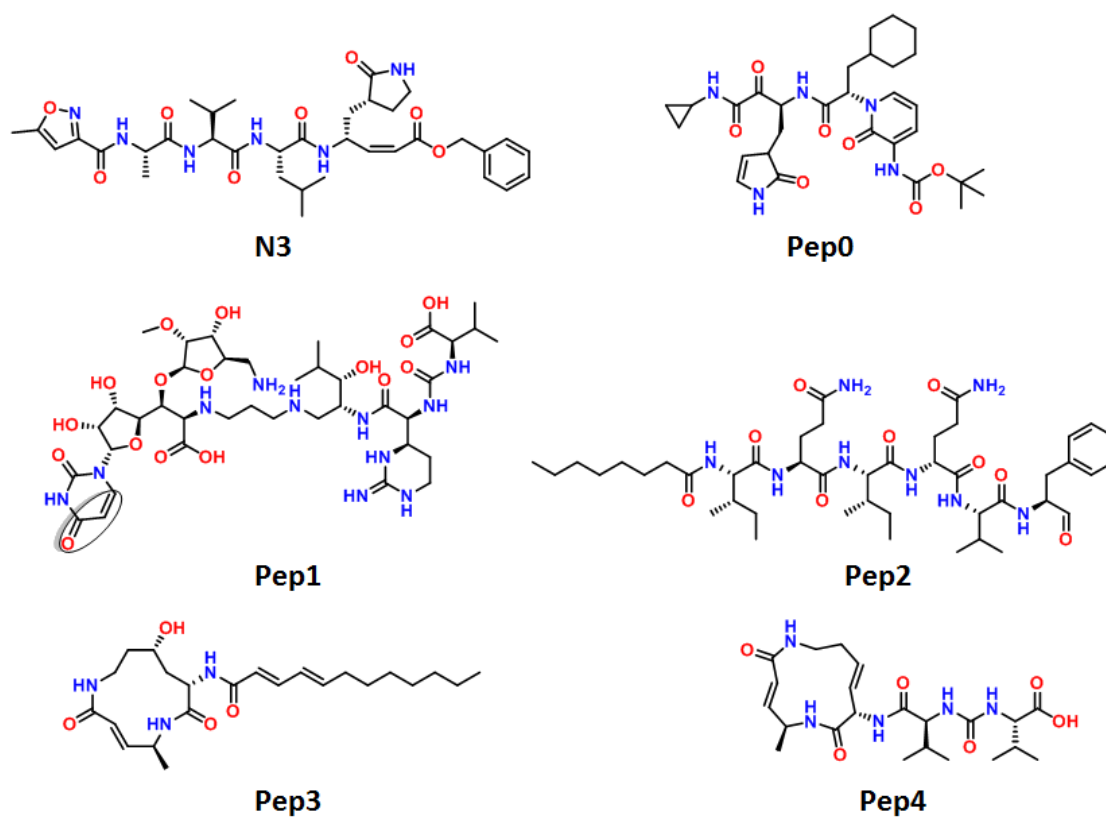

Figure S8: The structures of peptide based NPs (**Pep1-Pep4**) and small ligands crystallized with the SARC-CoV-2 M<sup>pro</sup> enzyme.

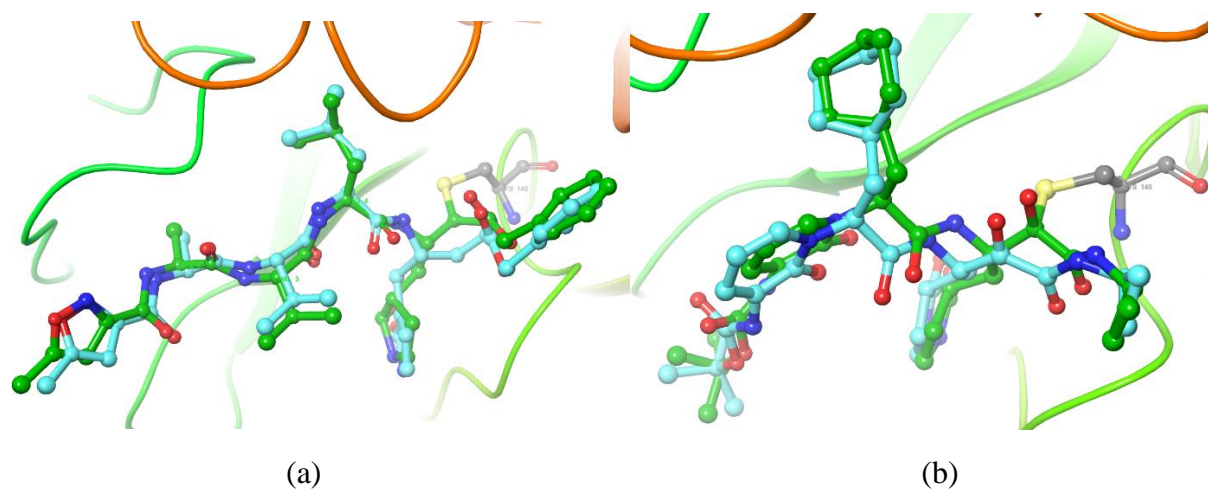

Figure S9: Overly of crystal structure and docked structure of SARC-CoV-2 M<sup>pro</sup> enzyme with (a) **N3** and (b) **Pep0** ligand

## (a) Alkaloids

Number of rotatable bond = NRB

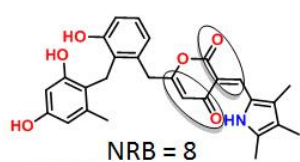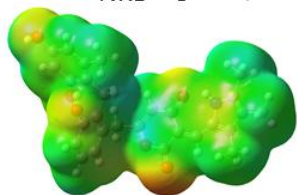

A1

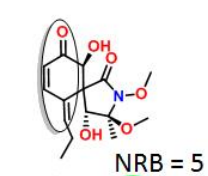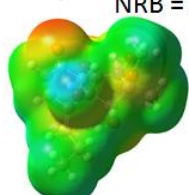

A2

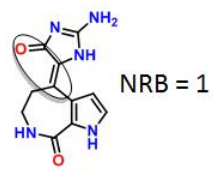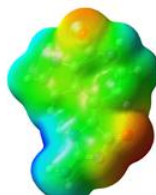

A3

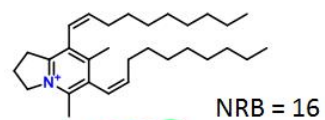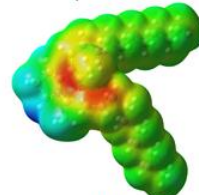

A4

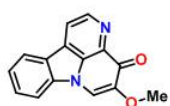

NRB = 1

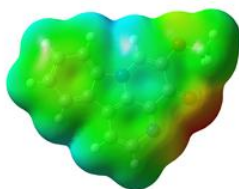

A5

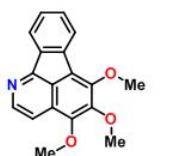

NRB = 3

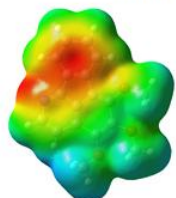

A6

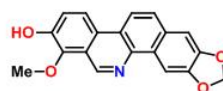

NRB = 1

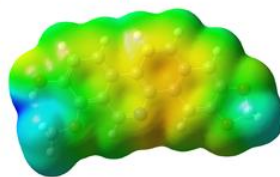

A7

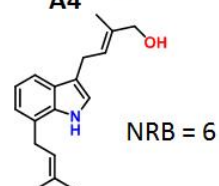

NRB = 6

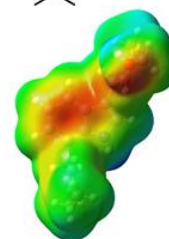

A8

Continued...

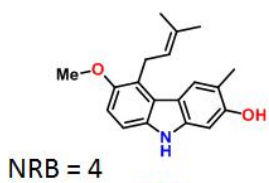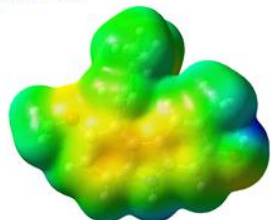

A9

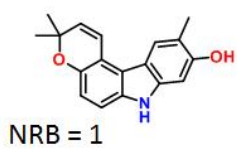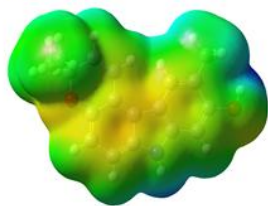

A10

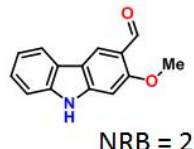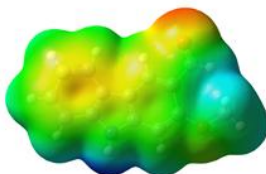

A11

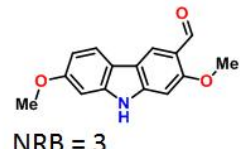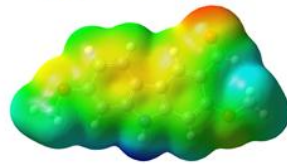

A12

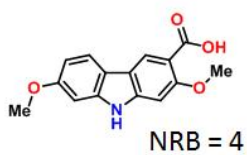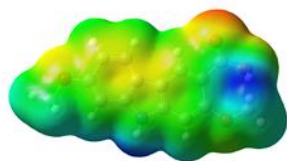

A13

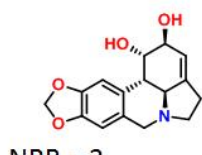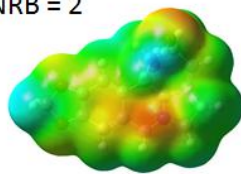

A14

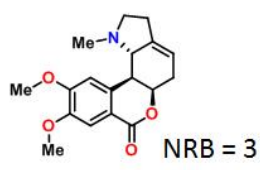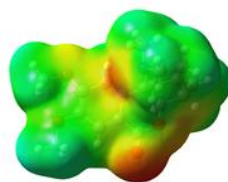

A15

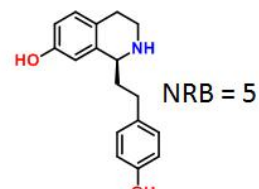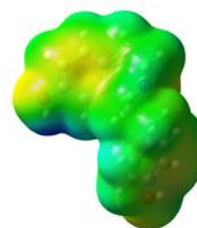

A16

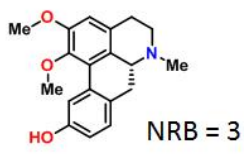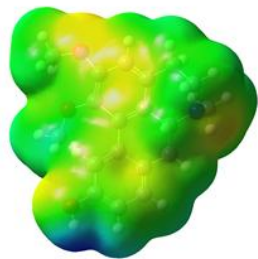

A17

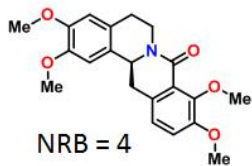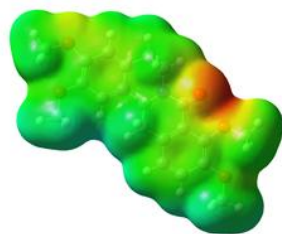

A18

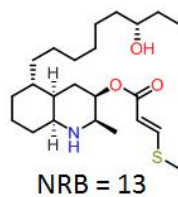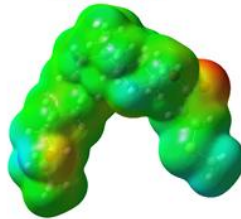

A19

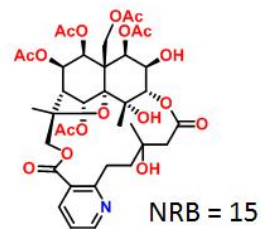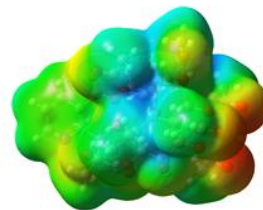

A20

Continued...

**(b) Terpenoids**

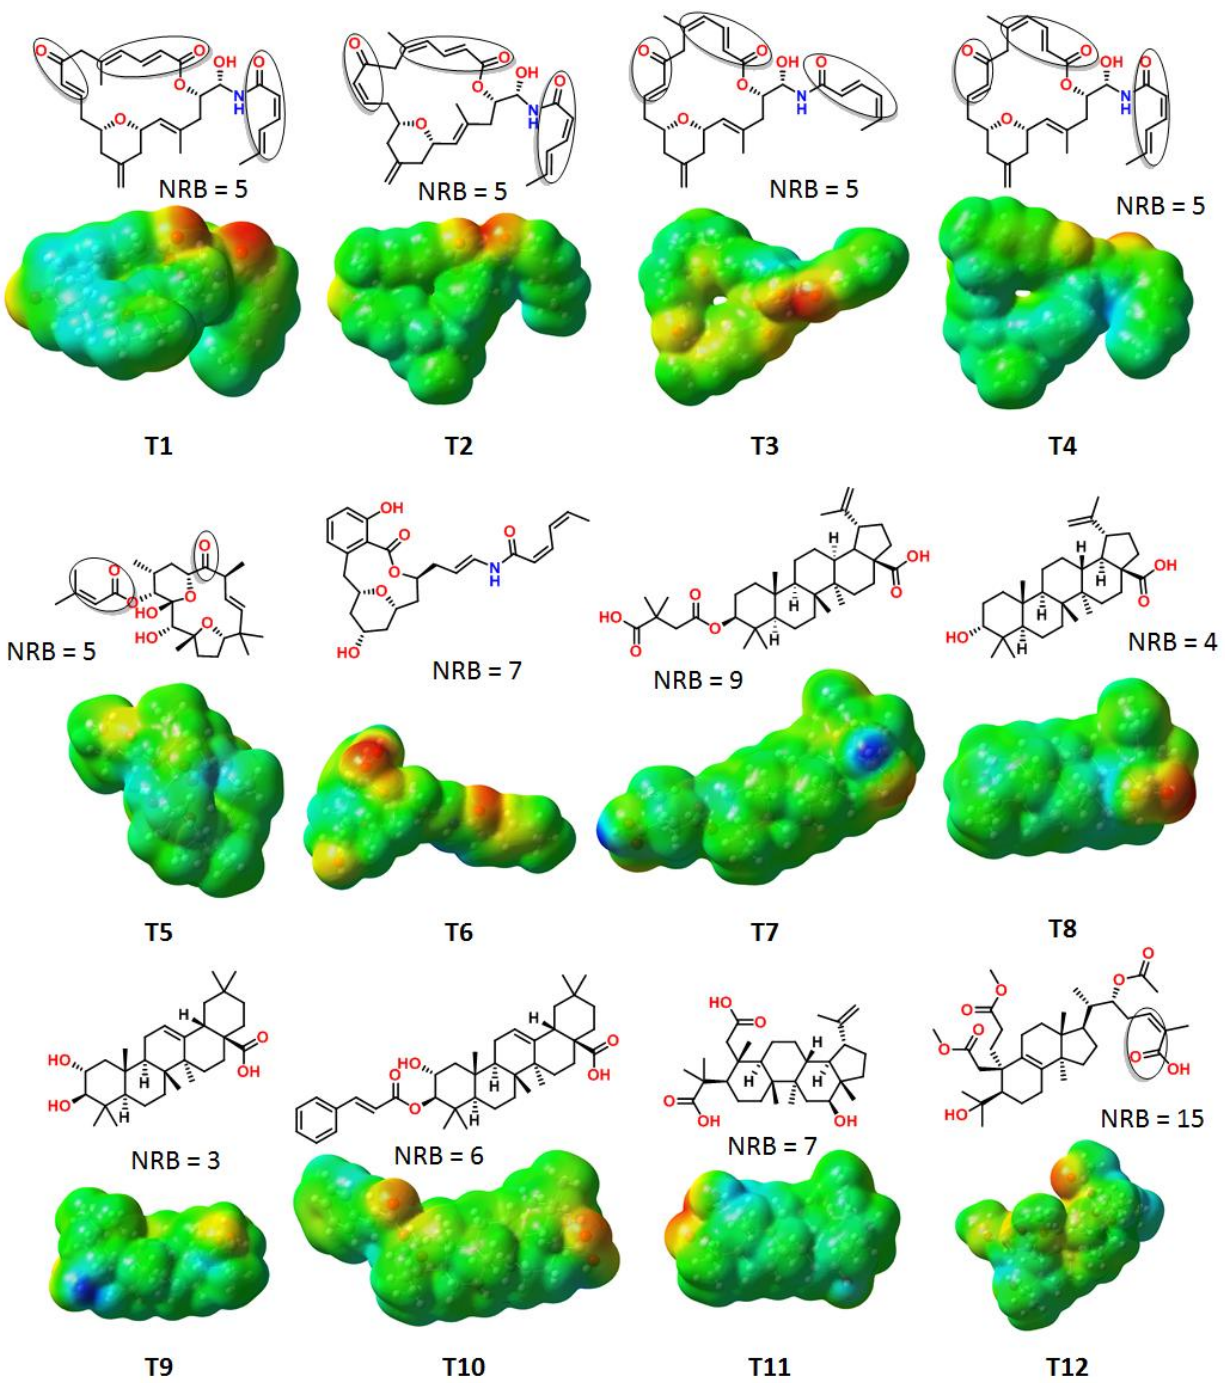

Continued...

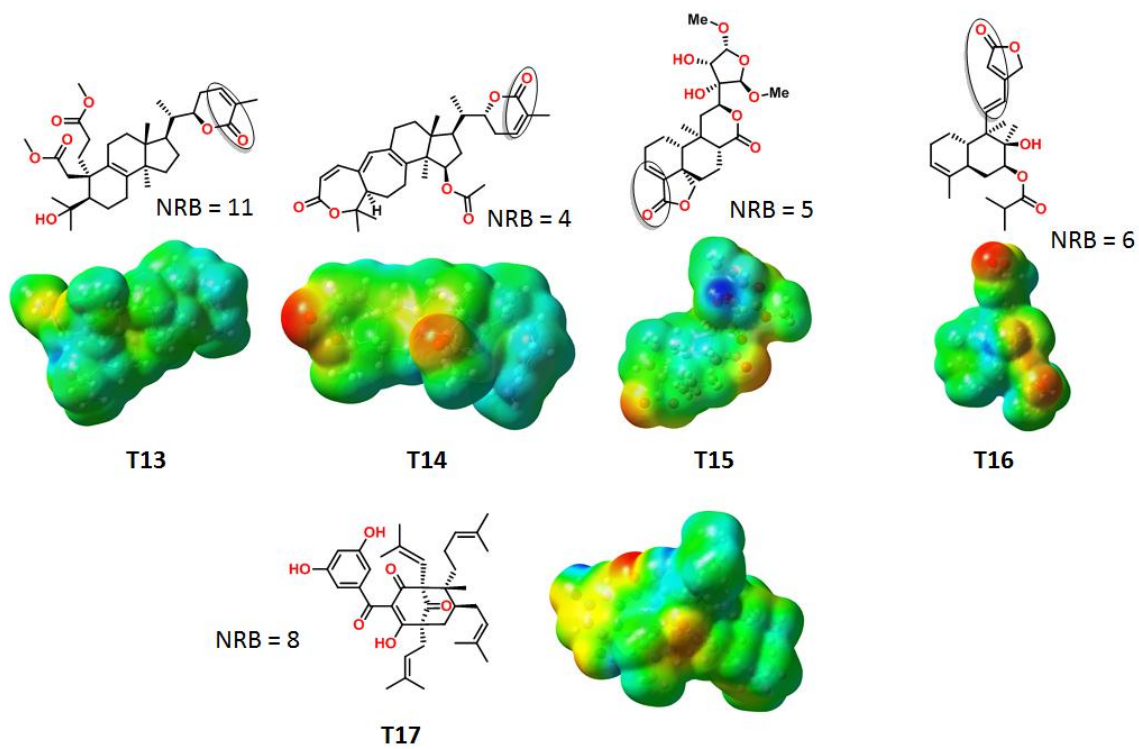

**(c) Polyphenolic**

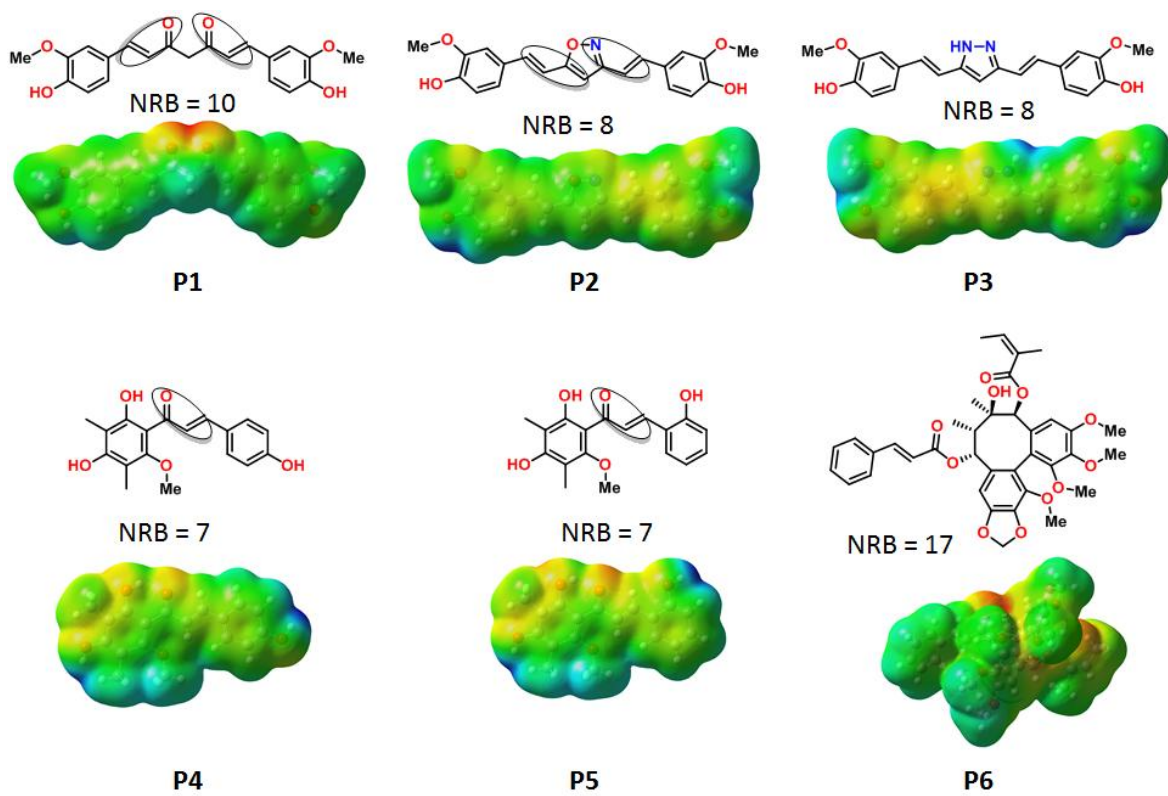

Continued...

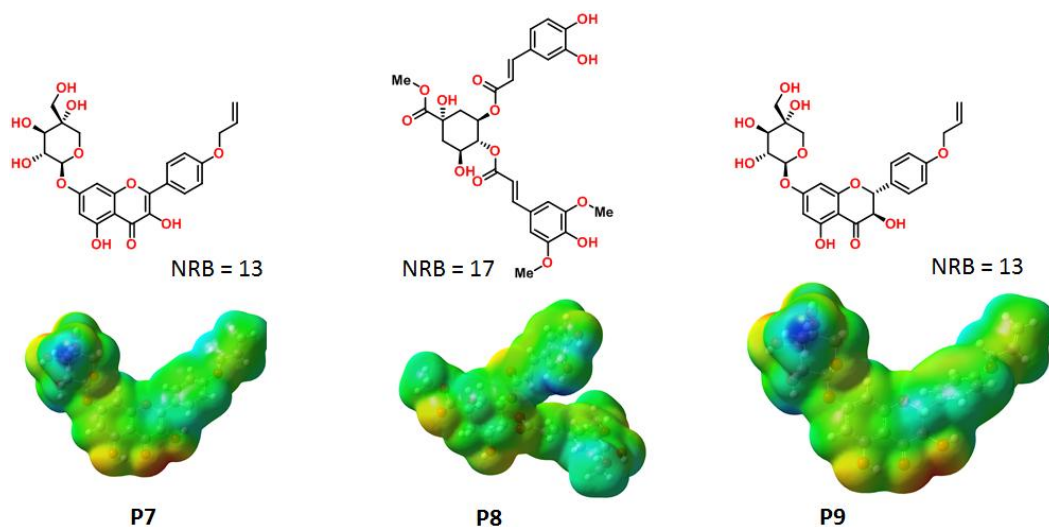

#### (d) Peptides

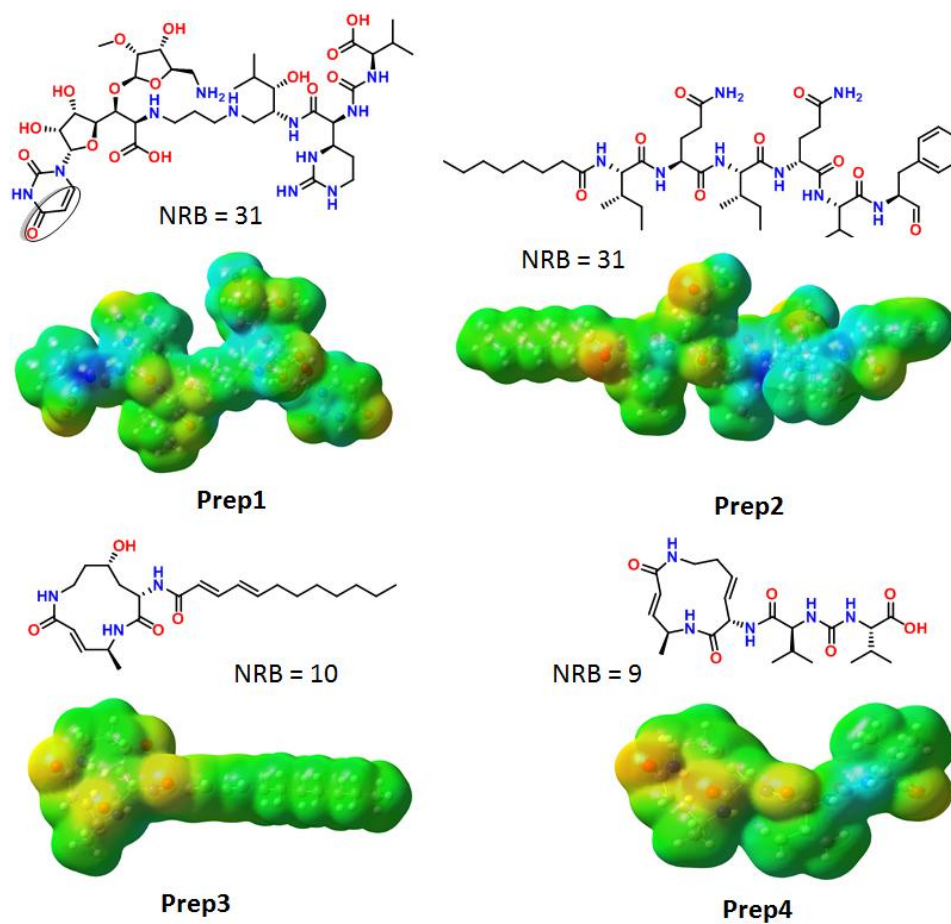

Figure S10: Molecular electrostatic potential surface and number of rotatable bonds of (a) Alkaloids, (b) Terpenoids, (c) Polyphenols and (d) Peptides.

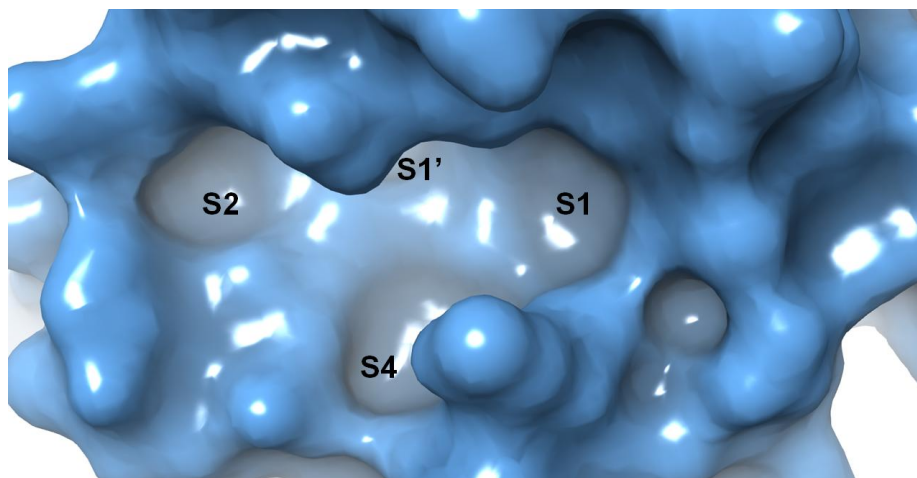

Figure S11: The four sites inside the active site of SARS-CoV-2 M<sup>Pro</sup> enzyme

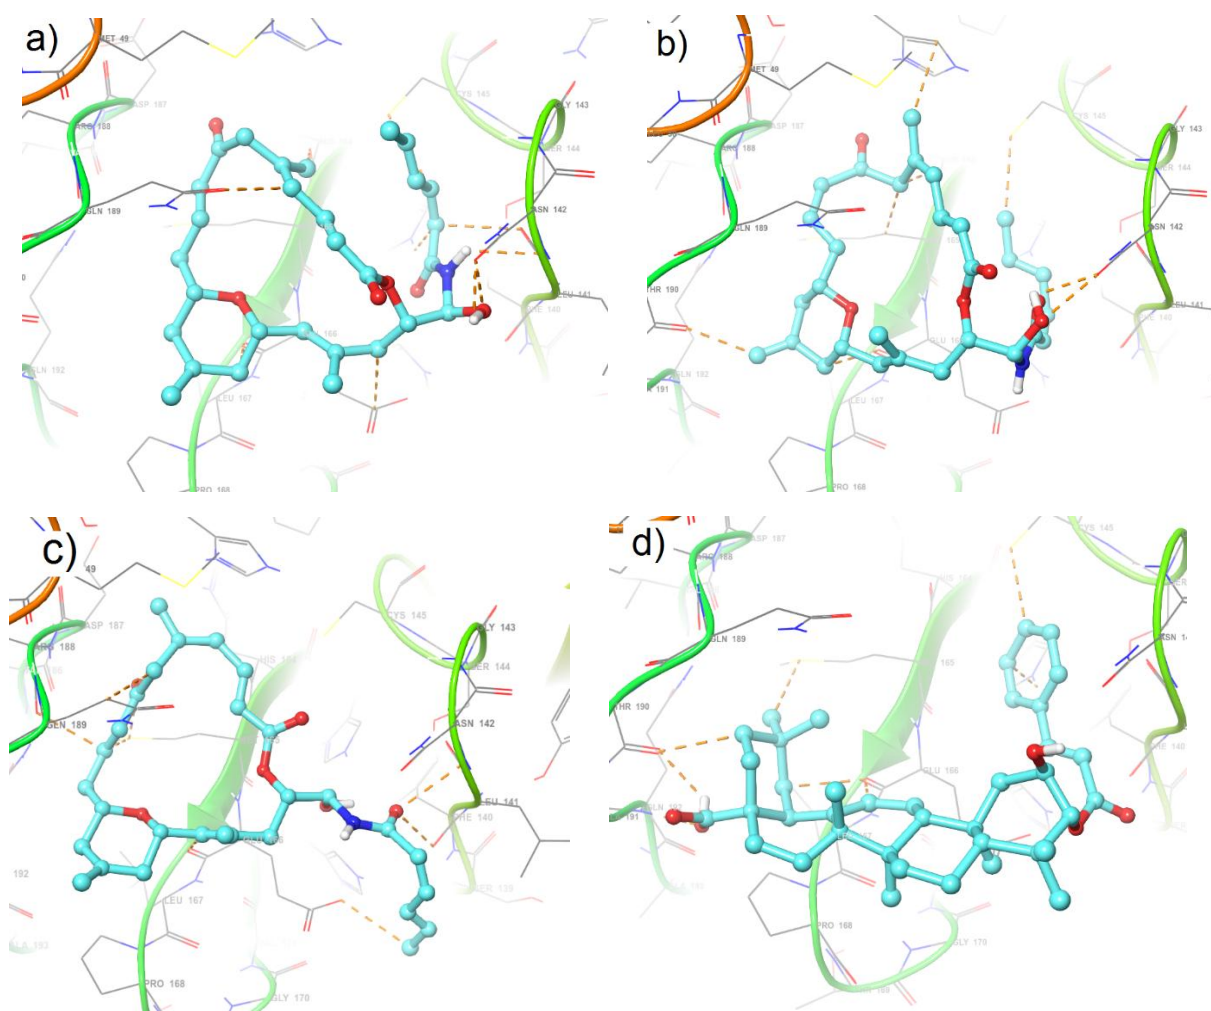



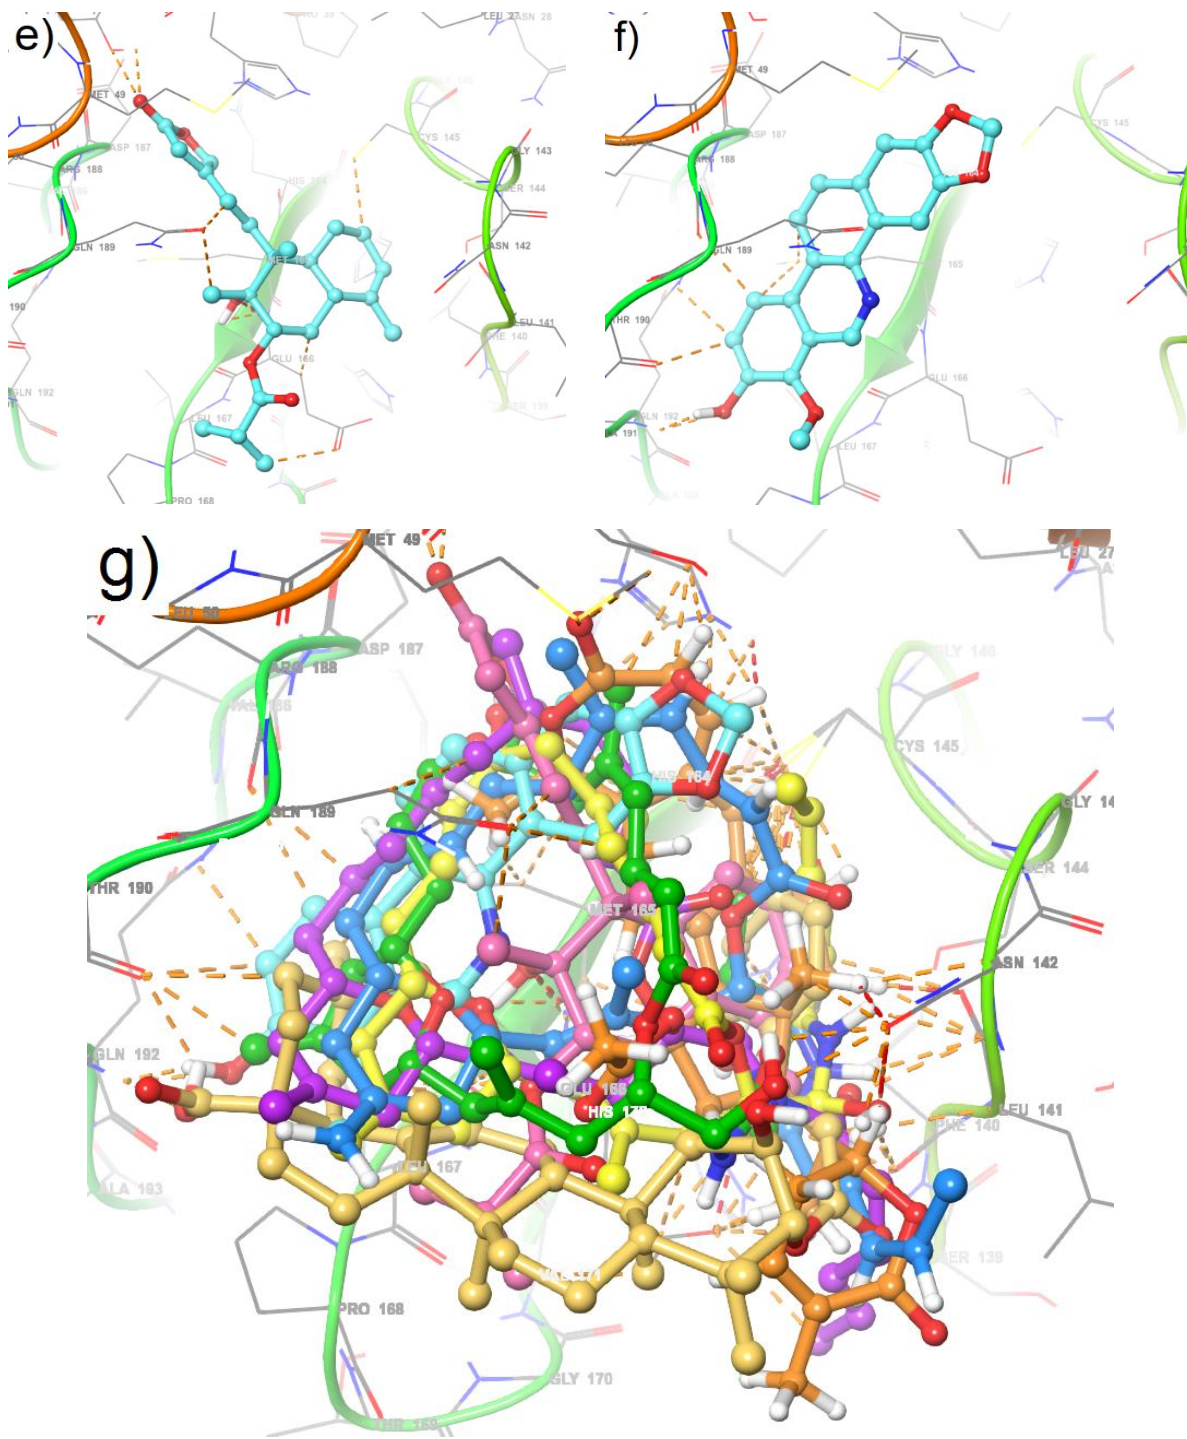

Figure S12: Docking poses and the binding interactions at the active site of SARC-CoV-2 M<sup>PRO</sup> enzyme of (a) T1, (b)T2, (c)T4, (d)T10, (e)T14 as well as (f)T16 and overlying docked structures of (g) T3, T14, T1, T2, T4, T10 and T16 at the active site of protein. The pictures also show that His41 and C145 interact the NPs.

**Table S1: Chemical structures, source and reported activities of the NPs**

| Compound                                                                                                                  | Source and Activity                                                                                                                                                                                                                                     | Reference                                                 |
|---------------------------------------------------------------------------------------------------------------------------|---------------------------------------------------------------------------------------------------------------------------------------------------------------------------------------------------------------------------------------------------------|-----------------------------------------------------------|
| <p><b>Alkaloid</b></p> <p><b>A1</b></p> 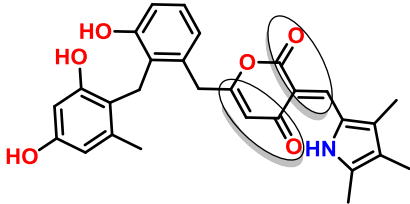 | <p><b>Marin microb:</b> mangrove-derived <i>Streptomyces albus</i>.</p>                                                                                                                                                                                 | <p><i>Nat. Prod. Rep.</i> <b>2020</b>,37, 175-223</p>     |
| <p><b>A2</b></p>                         | <p>Fungi: <i>Cochliobolus lunatus</i> anti-IAV activity.</p>                                                                                                                                                                                            | <p><i>Nat. Prod. Rep.</i>, 2020,37, 175-223</p>           |
| <p><b>A3</b></p>                        | <p>Sponge: <i>Stylissa carteri</i> anti HIV1 activity.</p>                                                                                                                                                                                              | <p><i>Nat. Prod. Rep.</i>, <b>2020</b>,37, 175-223</p>    |
| <p><b>A4</b></p>                       | <p>Anibamine, a novel pyridine quaternary alkaloid, Anibamine competed for the binding of I-gp120 to human CCR5 with an IC50 of 1 μM.</p>                                                                                                               | <p><i>Nat. Prod. Rep.</i>, <b>2010</b>, 27, 1781–1800</p> |
| <p><b>A5</b></p>                       | <p>Anewcanthin-4-one type alkaloid, drymaritin isolated from <i>Drymaria diandra</i> (also known as <i>Drymaria cordata</i> subsp. <i>diandra</i>) exhibited anti-HIV activity in H9 lymphocytes with an EC50 value of 0.699 μg/mL and a TI of 20.6</p> | <p><i>Nat. Prod. Rep.</i>, <b>2010</b>, 27, 1781–1800</p> |

|     |                                                                                     |                                                                                                                                                                                                                                                                                       |                                                           |
|-----|-------------------------------------------------------------------------------------|---------------------------------------------------------------------------------------------------------------------------------------------------------------------------------------------------------------------------------------------------------------------------------------|-----------------------------------------------------------|
| A6  | 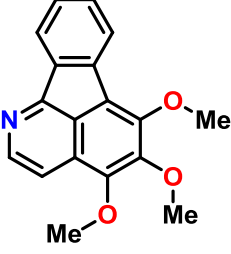   | <p>Norruffscine<br/>Plant: <i>Pericampylus glaucus</i>, a climbing shrub widely distributed in the southwest of China. Compound showed EC50 values of 10.9 and SI values of 45.7 against HIV-1 in C8166 cells.</p>                                                                    | <p><i>Nat. Prod. Rep.</i>, <b>2010</b>, 27, 1781–1800</p> |
| A7  |    | <p>Decarine<br/>Plant: root bark of <i>Zanthoxylum ailanthoides</i> potent anti-HIV, EC50 values of &lt;0.1 mg/mL and TI values of &gt;226.</p>                                                                                                                                       | <p><i>Nat. Prod. Rep.</i>, <b>2010</b>, 27, 1781–1800</p> |
| A8  |   | <p>(E)-3-(3-hydroxymethyl-2-butenyl)-7-(3-methyl-2-butenyl)-1H-indole was isolated from the twigs and leaves of <i>Glycosmis montana</i> native to China. Potent anti-HIV activity with an IC50 value of 1.17 mg/mL and an SI of 11.68</p>                                            | <p><i>Nat. Prod. Rep.</i>, <b>2010</b>, 27, 1781–1800</p> |
| A9  |  | <p>Glybomine was isolated from the twigs and leaves of <i>Glycosmis montana</i>. Earlier these alkaloids were reported from <i>G. arborea</i>. <i>in vitro</i> inhibitory activity against HIV replication in C8166 cells. Anti-HIV activity with an IC50 of 9.73 μ/mL.</p>           | <p><i>Nat. Prod. Rep.</i>, <b>2010</b>, 27, 1781–1800</p> |
| A10 |  | <p>Glycoborinine (7), was isolated from the twigs and leaves of <i>Glycosmis montana</i>. Earlier these alkaloids were reported from <i>G. arborea</i>. <i>in vitro</i> inhibitory activity against HIV replication in C8166 cells. Anti-HIV activity with an IC50 of 4.47 μg/mL.</p> | <p><i>Nat. Prod. Rep.</i>, <b>2010</b>, 27, 1781–1800</p> |

|     |                                                                                     |                                                                                                                                                                                                                                 |                                                           |
|-----|-------------------------------------------------------------------------------------|---------------------------------------------------------------------------------------------------------------------------------------------------------------------------------------------------------------------------------|-----------------------------------------------------------|
| A11 | 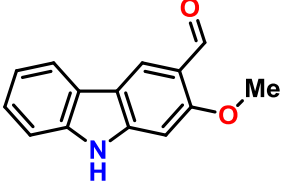   | <p>O-methylmukonal isolated from the rhizomes and roots of the plant: <i>Clausena excavata</i>. Compound showed anti-HIV-1 activity in a syncytial assay, with EC<sub>50</sub> values of 12.0 μM and TI of 56.7</p>             | <p><i>Nat. Prod. Rep.</i>, <b>2010</b>, 27, 1781–1800</p> |
| A12 |    | <p>3-formyl-2,7-dimethoxycarbazole isolated from the rhizomes and roots of the plant: <i>Clausena excavata</i>. Compound showed anti-HIV-1 activity in a syncytial assay, with EC<sub>50</sub> values of 29.1 μM and TI 8.0</p> | <p><i>Nat. Prod. Rep.</i>, <b>2010</b>, 27, 1781–1800</p> |
| A13 |   | <p>clauszolineJ isolated from the rhizomes and roots of plant: <i>Clausena excavata</i>. Compounds showed anti-HIV-1 activity in a syncytial assay, with EC<sub>50</sub> values of 34.2 μM and TI of 1.6</p>                    | <p><i>Nat. Prod. Rep.</i>, <b>2010</b>, 27, 1781–1800</p> |
| A14 |  | <p>Amaryllidaceae alkaloids (lycorine) isolated from the bulbs of the plant: <i>Leucojum vernum</i>, possess anti-HIV-1 activity in MT4 cells with ID<sub>50</sub> values of 0.4 μg/mL.</p>                                     | <p><i>Nat. Prod. Rep.</i>, <b>2010</b>, 27, 1781–1800</p> |
| A15 |  | <p>Amaryllidaceae alkaloids homolycorine isolated from the bulbs of the plant: <i>Leucojum vernum</i> possess anti-HIV-1 activity in MT4 cells with ID<sub>50</sub> values 7.3 μg/mL.</p>                                       | <p><i>Nat. Prod. Rep.</i>, <b>2010</b>, 27, 1781–1800</p> |

|                        |                                                                                     |                                                                                                                                                                                                                                                                                            |                                                                        |
|------------------------|-------------------------------------------------------------------------------------|--------------------------------------------------------------------------------------------------------------------------------------------------------------------------------------------------------------------------------------------------------------------------------------------|------------------------------------------------------------------------|
| A16                    | 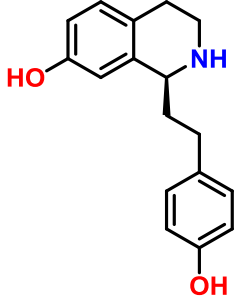   | <p>Alkaloids, (+)-1-(R)<br/>coclaurine<br/>Plant: leaves of<br/><i>Nelumbo nucifera</i>, a perennial<br/>aquatic crop grown<br/>throughout<br/>Asia, showed anti-HIV<br/>activity with EC50 values of<br/>0.8 µg/mL and TI values of<br/>&gt;125.</p>                                      | <p><i>Nat. Prod.<br/>Rep.</i>, <b>2010</b>,<br/>27, 1781–<br/>1800</p> |
| A17                    |    | <p>Nuciferine, isolated from the<br/>plant: <i>Nymphaea caerulea</i><br/>anti-HIV activity EC50 of 0.8<br/>µg/mL and TI of<br/>36.</p>                                                                                                                                                     | <p><i>Nat. Prod.<br/>Rep.</i>, <b>2010</b>,<br/>27, 1781–<br/>1800</p> |
| A18                    |   | <p>(-)-8-oxotetrahydropalmatine<br/>were isolated from plant :<br/><i>Pericampylus glaucus</i>, a<br/>climbing shrub widely<br/>distributed in the south west<br/>of China. Compound showed<br/>EC50 values of 14.1 µM and<br/>SI values of 18.8 against<br/>HIV-1 in C8166 cells.</p>     | <p><i>Nat. Prod.<br/>Rep.</i>, <b>2010</b>,<br/>27, 1781–<br/>1800</p> |
| A19                    |  | <p>Isolated from a marine<br/>invertebrate animal <i>Didemnum</i><br/><i>sp.</i> (a tunicate).</p>                                                                                                                                                                                         | <p><i>Nat. Prod.<br/>Rep.</i> <b>2020</b>, <b>37</b>,<br/>175-223</p>  |
| A20                    |  | <p>tripfordine A<br/><b>Plant:</b> roots of poisonous<br/>liana <i>Tripterygium wilfordii</i>.<br/>The highly toxic roots are<br/>known as ‘lei gong teng’ in<br/>Chinese folklore and used as<br/>an Insecticide. anti-HIV<br/>activity, with an EC50 of 13.4<br/>µg/mL and TI of 1.9</p> | <p><i>Nat. Prod.<br/>Rep.</i>, <b>2010</b>,<br/>27, 1781–<br/>1800</p> |
| <p><b>Terpenes</b></p> |                                                                                     |                                                                                                                                                                                                                                                                                            |                                                                        |

|    |                                                                                     |                                                                                                                                                                                                            |                                                               |
|----|-------------------------------------------------------------------------------------|------------------------------------------------------------------------------------------------------------------------------------------------------------------------------------------------------------|---------------------------------------------------------------|
| T1 | 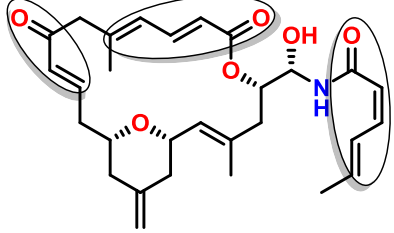   | <p>Isolated from the marine Sponge<br/> <i>Cacospongia mycofijiensis</i><br/> Exhibit nanomolar cytotoxicity toward the HL-60 cell line, are antimitotic, and induce in vitro tubulin polymerization.</p>  | <p><i>J. Nat. Prod.</i> <b>2018</b>, <i>81</i>, 2539-2544</p> |
| T2 |    | <p>Isolated from the marine Sponge<br/> <i>Cacospongia mycofijiensis</i><br/> Exhibit nanomolar cytotoxicity toward the HL-60 cell line, are antimitotic, and induce in vitro tubulin polymerization.</p>  | <p><i>J. Nat. Prod.</i> <b>2018</b>, <i>81</i>, 2539-2544</p> |
| T3 |   | <p>Isolated from the marine Sponge<br/> <i>Cacospongia mycofijiensis</i><br/> Exhibit nanomolar cytotoxicity toward the HL-60 cell line, are antimitotic, and induce in vitro tubulin polymerization.</p>  | <p><i>J. Nat. Prod.</i> <b>2018</b>, <i>81</i>, 2539-2544</p> |
| T4 |  | <p>Isolated from the marine Sponge<br/> <i>Cacospongia mycofijiensis</i>.<br/> Exhibit nanomolar cytotoxicity toward the HL-60 cell line, are antimitotic, and induce in vitro tubulin polymerization.</p> | <p><i>J. Nat. Prod.</i> <b>2018</b>, <i>81</i>, 2539-2544</p> |
| T5 |  | <p>Microb: bacteria <i>Excoecaria venenta</i><br/> The anti-viral activity of these compounds against the chikungunya virus.</p>                                                                           | <p><i>Nat. Prod. Rep.</i>, <b>2016</b>, <i>33</i>, 1227</p>   |
| T6 |  | <p>Apicularen (22)<br/> anti-HIV and anti-HCV hits, inhibitor of HPV replication (SI= 3–6 in Hela cells).</p>                                                                                              | <p><i>Nat. Prod. Rep.</i>, <b>2015</b>, <i>32</i>, 29-48</p>  |

|     |                                                                                     |                                                                                                                                                                                                                                                                                                                                                                                                     |                                                           |
|-----|-------------------------------------------------------------------------------------|-----------------------------------------------------------------------------------------------------------------------------------------------------------------------------------------------------------------------------------------------------------------------------------------------------------------------------------------------------------------------------------------------------|-----------------------------------------------------------|
| T7  | 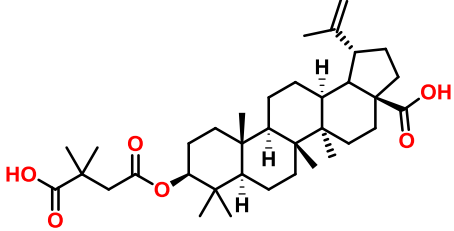   | <p><b>Plant:</b> <i>Platanus acerifolia</i> (London plane tree)<br/> <b>Usable Part:</b> bark<br/> Induces apoptosis through the mitochondrial pathway. A typical decrease in bcl-2 and cyclin D1 gene expression and increase in bax gene expression was observed in several cancer cell lines; inhibits NF-kB expression in androgen refractory, human prostate cancer cells (PC-3).</p>          | <p><i>Nat. Prod. Rep.</i>, <b>2019</b>, 36, 1654-1686</p> |
| T8  |    | <p><b>Plant:</b> <i>Platanus acerifolia</i> (London plane tree)<br/> <b>Usable Part:</b> bark<br/> Activity induces apoptosis through the mitochondrial pathway. A typical decrease in bcl-2 and cyclin D1 gene expression and increase in bax gene expression was observed in several cancer cell lines; inhibits NF-kB expression in androgen refractory, human prostate cancer cells (PC-3).</p> | <p><i>Nat. Prod. Rep.</i>, <b>2016</b>, 33, 1227</p>      |
| T9  |  | <p>Maslinic acid an oleanane triterpene identified from <i>Crataegus oxyacantha</i>, apple peel and was also isolated quantitatively from olive fruit and show effect only on the Caco-2 cell line (EC50: 15.4 mM), anti-proliferative effect against the HT-29 cell line (EC50: 101.2 mM) without any necrotic effects.</p>                                                                        | <p><i>Nat. Prod. Rep.</i>, <b>2009</b>, 26, 1321–1344</p> |
| T10 |  | <p>Isolated from <i>Crataegus oxyacantha</i>, showed minor antiproliferative effects against HepG2 (EC50: 17.9–20.6 mM), MCF-7 (EC50:</p>                                                                                                                                                                                                                                                           | <p><i>Nat. Prod. Rep.</i>, <b>2009</b>, 26, 1321–1344</p> |

|            |                                                                                     |                                                                                                                                     |                                                      |
|------------|-------------------------------------------------------------------------------------|-------------------------------------------------------------------------------------------------------------------------------------|------------------------------------------------------|
|            |                                                                                     | 20.9–29.2 mM), and Caco-2 (EC50: 8.9–14.2 mM),                                                                                      |                                                      |
| <b>T11</b> | 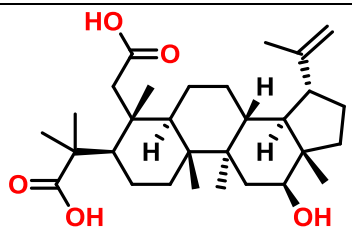   | <i>Stauntonia obovatifoliola</i><br>anti-HIV-1 protease activity<br>(EC50: 17.8 mM).                                                | <i>Nat. Prod. Rep.</i> , <b>2019</b> , 36, 1654-1686 |
| <b>T12</b> |    | <b>Fungi:</b> Mushroom<br><i>Ganoderma colossum</i> .<br>anti-protease activity (tested against HIV-1)<br>with EC50 values of 14.6. | <i>Nat. Prod. Rep.</i> , <b>2019</b> , 36, 1654-1686 |
| <b>T13</b> |   | <b>Fungi:</b> Mushroom<br><i>Ganoderma colossum</i> .<br>anti-protease activity (tested against HIV-1)<br>with EC50 values of 24.7  | <i>Nat. Prod. Rep.</i> , <b>2019</b> , 36, 1654-1686 |
| <b>T14</b> |  | <b>Fungi:</b> Mushroom<br><i>Ganoderma colossum</i> .<br>anti-HIV-1 protease inhibition activity. with EC50 values of 15.3          | <i>Nat. Prod. Rep.</i> , <b>2019</b> , 36, 1654-1686 |
| <b>T15</b> |  | Isolated from the plant <i>Dichrocephala benthamii</i> (Asteraceae)<br>possess anti-HIV integrase activity.                         | <i>Nat. Prod. Rep.</i> , <b>2019</b> , 36, 1654-1686 |



|                           |                                                                                     |                                                                                                                                                                                                                                                                                                                                                                          |                                                          |
|---------------------------|-------------------------------------------------------------------------------------|--------------------------------------------------------------------------------------------------------------------------------------------------------------------------------------------------------------------------------------------------------------------------------------------------------------------------------------------------------------------------|----------------------------------------------------------|
| T16                       | 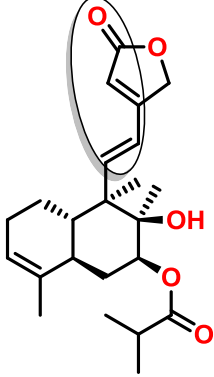   | <p>Known as micafungin or FK463,41 is now marketed as the intravenous antifungal drug Mycamine essential component of fungal cell walls.</p>                                                                                                                                                                                                                             | <p><i>Nat. Prod. Rep.</i>, <b>2019</b>,36, 1654-1686</p> |
| T17                       |    | <p>Plant: <i>Symphonia globulifera</i> purified from other species, belonging to the Clusiaceae family, such as <i>Garcinia livingstonei</i>, and <i>G. macrophylla</i><br/>Usable Part: Roots<br/>antibacterial, anti-HIV, trypanocidal, anti-malarial, anti-cancer, and leishmanicidal activities, anti-parasitic activity.<br/>IC50 value 2.95 <math>\mu</math>M.</p> | <p><i>Nat. Prod. Rep.</i>, <b>2016</b>,33, 372-381</p>   |
| <b>Phenolic Compounds</b> |                                                                                     |                                                                                                                                                                                                                                                                                                                                                                          |                                                          |
| P1                        |  | <p>Plant: <i>Curcuma longa</i>.<br/>HIV1 protease.</p>                                                                                                                                                                                                                                                                                                                   | <p><i>Nat. Prod. Rep.</i>, <b>2011</b>, 28, 1937</p>     |
| P2                        |  | <p>Synthesised derivatives of P1</p>                                                                                                                                                                                                                                                                                                                                     |                                                          |
| P3                        |  | <p>Synthesised derivatives of P1</p>                                                                                                                                                                                                                                                                                                                                     |                                                          |
| P4                        |  | <p><b>Plant:</b> <i>Cleistocalyx operculatus</i> have neuraminidase (NA) inhibiting properties, with (E)-4,2,4- trihydroxy-6-methoxy-3,5-dimethylchalcone (IC50 3.31–20.45 <math>\mu</math>M)<br/>Strongest effects against NA from the novel influenza H1N1 .</p>                                                                                                       | <p><i>Nat. Prod. Rep.</i>, <b>2012</b> 29, 11</p>        |

|    |                                                                                     |                                                                                                                                                                                                                                                                                                                               |                                                           |
|----|-------------------------------------------------------------------------------------|-------------------------------------------------------------------------------------------------------------------------------------------------------------------------------------------------------------------------------------------------------------------------------------------------------------------------------|-----------------------------------------------------------|
| P5 | 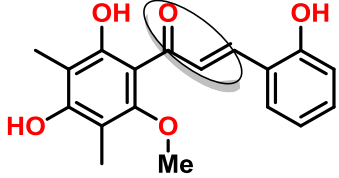   | <p><b>Plant:</b> <i>Cleistocalyx operculatus</i> with 2,2,4-trihydroxy-6-methoxy-3,5-dimethylchalcone (IC<sub>50</sub> 2.55–28.12 μM) strongest effects against NA from the oseltamivir resistant H1N1 (H274Y mutant).</p>                                                                                                    | <p><i>Nat. Prod. Rep.</i>, <b>2012</b> 29, 11</p>         |
| P6 |    | <p>Tiegusanin G (29) was one of 14 new lignans isolated from a 70% aqueous acetone extract of the aerial parts of plant <i>Schisandra propinqua</i> var. <i>sinensis</i>, popularly known as 'tie-gusan' in China. anti-HIV-1 activity in the C8166 cell line, with an EC<sub>50</sub> value of 7.9 mM and TI of &gt; 25.</p> | <p><i>Nat. Prod. Rep.</i>, <b>2010</b>, 27, 1781–1800</p> |
| P7 |  | <p>6-(g,g-dimethylallyl)dihydroquercetin-7-O-beta-D-glucoside) Plant: <i>Ochna integerrima</i> (Methanolic extract) anti-HIV-1 activity with an EC<sub>50</sub> of 14.0 μg/mL.</p>                                                                                                                                            | <p><i>Nat. Prod. Rep.</i>, <b>2010</b>, 27, 1781–1800</p> |
| P8 |  | <p>Methyl-5-O-caffeoyl-3-O-sinapoylquininate Plant: <i>Gardenia jasminoides</i> (isolated by bioactivity-guided fractionation of the ethyl acetate extract of this plant) HIV-1IN inhibitory activity with an IC<sub>50</sub> of 20 μg/mL.</p>                                                                                | <p><i>Nat. Prod. Rep.</i>, <b>2010</b>, 27, 1781–1800</p> |

|                        |                                                                                     |                                                                                                                                                                                                      |                                                           |
|------------------------|-------------------------------------------------------------------------------------|------------------------------------------------------------------------------------------------------------------------------------------------------------------------------------------------------|-----------------------------------------------------------|
| <p><b>P9</b></p>       | 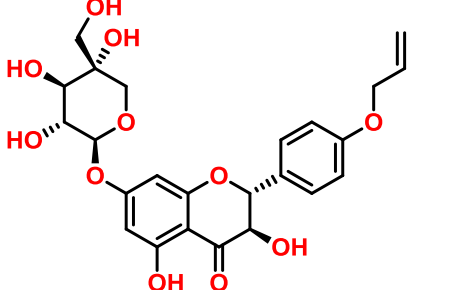   | <p>Flavonoid glycosides 6-(g,g-dimethylallyl)dihydrokaempferol-7-O-beta-D-glucoside<br/>Plant: <i>Ochna integerrima</i> (Methanolic extract)<br/>anti-HIV-1 activity with an EC50 of 29.1 µg/mL.</p> | <p><i>Nat. Prod. Rep.</i>, <b>2010</b>, 27, 1781–1800</p> |
| <p><b>Peptides</b></p> |                                                                                     |                                                                                                                                                                                                      |                                                           |
| <p><b>Pep1</b></p>     |    | <p>Muraymycin C1 found to have good enzyme inhibitory activity and no toxicity.</p>                                                                                                                  | <p><i>Nat. Prod. Rep.</i>, <b>2016</b>, 33, 372-381</p>   |
| <p><b>Pep2</b></p>     |    | <p>antipain a microbial alkaline protease inhibitor<br/><b>Bacterium:</b> <i>Streptomyces albulus</i> NRRL B-3066.</p>                                                                               | <p><i>Nat. Prod. Rep.</i>, <b>2019</b>, 36, 1654-1686</p> |
| <p><b>Pep3</b></p>     |   | <p>glidobactins<br/>Syrbactins are potent and irreversible inhibitors of the eukaryotic proteasome by oxa-Michael-type addition of a catalytic threonine at the a,b-unsaturated amide.</p>           | <p><i>Nat. Prod. Rep.</i>, <b>2019</b>, 36, 1654-1686</p> |
| <p><b>Pep4</b></p>     |  | <p>syringolins<br/>Syrbactins are potent and irreversible inhibitors of the eukaryotic proteasome by oxa-Michael-type addition of a catalytic threonine at the a,b-unsaturated amide.</p>            | <p><i>Nat. Prod. Rep.</i>, <b>2019</b>, 36, 1654-1686</p> |

**Table S2:** Predicted data of lipophilicity and water solubility of the NPs

|                                     | <b>A7</b> | <b>T3</b> | <b>T14</b> | <b>T1</b> | <b>T2</b> | <b>T4</b> | <b>T10</b> | <b>T16</b> |
|-------------------------------------|-----------|-----------|------------|-----------|-----------|-----------|------------|------------|
| iLOGP                               | 3.35      | 4.31      | 4.05       | 4.31      | 4.31      | 4.31      | 5.2        | 3.89       |
| XLOGP3                              | 4.12      | 3.51      | 5.57       | 3.51      | 3.51      | 3.51      | 9.17       | 3.37       |
| WLOGP                               | 3.98      | 4.33      | 6.17       | 4.33      | 4.33      | 4.33      | 8.36       | 3.73       |
| MLOGP                               | 2.08      | 2.49      | 4.9        | 2.49      | 2.49      | 2.49      | 6.15       | 3.27       |
| Silicos-IT<br>Log P                 | 3.86      | 3.54      | 5.54       | 3.54      | 3.54      | 3.54      | 7.19       | 3.98       |
| Consensus<br>Log P                  | 3.48      | 3.63      | 5.25       | 3.63      | 3.63      | 3.63      | 7.21       | 3.65       |
| ESOL Log S                          | -4.9      | -4.79     | -6.33      | -4.79     | -4.79     | -4.79     | -9.13      | -4.04      |
| ESOL<br>Solubility<br>(mg/ml)       | 3.98E-03  | 7.96E-03  | 2.47E-04   | 7.96E-03  | 7.96E-03  | 7.96E-03  | 4.51E-07   | 3.53E-02   |
| ESOL<br>Solubility<br>(mol/l)       | 1.25E-05  | 1.61E-05  | 4.72E-07   | 1.61E-05  | 1.61E-05  | 1.61E-05  | 7.49E-10   | 9.08E-05   |
| ESOL<br>Class                       | M.S.      | M.S.      | P.S.       | M.S.      | M.S.      | M.S.      | P.S.       | M.S.       |
| Ali Log S                           | -5.1      | -5.33     | -6.99      | -5.33     | -5.33     | -5.33     | -10.83     | -4.58      |
| Ali<br>Solubility<br>(mg/ml)        | 2.52E-03  | 2.30E-03  | 5.37E-05   | 2.30E-03  | 2.30E-03  | 2.30E-03  | 8.97E-09   | 1.03E-02   |
| Ali<br>Solubility<br>(mol/l)        | 7.88E-06  | 4.63E-06  | 1.03E-07   | 4.63E-06  | 4.63E-06  | 4.63E-06  | 1.49E-11   | 2.64E-05   |
| Ali Class                           | M.S.      | M.S.      | P.S.       | M.S.      | M.S.      | M.S.      | Insolu.    | M.S.       |
| Silicos-IT<br>LogSw                 | -6.34     | -3.33     | -5.81      | -3.33     | -3.33     | -3.33     | -8.01      | -3.3       |
| Silicos-IT<br>Solubility<br>(mg/ml) | 1.47E-04  | 2.32E-01  | 8.06E-04   | 2.32E-01  | 2.32E-01  | 2.32E-01  | 5.85E-06   | 1.93E-01   |
| Silicos-IT<br>Solubility<br>(mol/l) | 4.60E-07  | 4.69E-04  | 1.54E-06   | 4.69E-04  | 4.69E-04  | 4.69E-04  | 9.71E-09   | 4.98E-04   |
| Silicos-IT<br>class                 | P.S.      | Solu.     | M.S.       | Solu.     | Solu.     | Solu.     | P.S.       | Solu.      |

Solu. = Soluble, M.S. = Moderately soluble, P.S. = Poorly soluble, Insolu. = Insoluble.

**Table S3:** Predicted data of pharmacokinetics, drug likeness and medicinal chemistry of the NPs

|                   | <b>A7</b> | <b>T3</b> | <b>T14</b> | <b>T1</b> | <b>T2</b> | <b>T4</b> | <b>T10</b> | <b>T16</b> |
|-------------------|-----------|-----------|------------|-----------|-----------|-----------|------------|------------|
| GI absorption     | High      | High      | High       | High      | High      | High      | Low        | High       |
| BBB permeant      | Yes       | No        | No         | No        | No        | No        | No         | Yes        |
| CYP1A2 inhibitor  | Yes       | Yes       | Yes        | Yes       | Yes       | Yes       | No         | No         |
| CYP2C19 inhibitor | Yes       | No        | No         | No        | No        | No        | No         | No         |
| CYP2C9 inhibitor  | Yes       | No        | No         | No        | No        | No        | No         | No         |
| CYP2D6 inhibitor  | Yes       | Yes       | Yes        | Yes       | Yes       | Yes       | No         | Yes        |
| CYP3A4 inhibitor  | Yes       | Yes       | No         | Yes       | Yes       | Yes       | No         | Yes        |

**Table S4:** Predicted data of cardiotoxicity of NPs compounds<sup>5</sup>

| Compound  | Prediction / Potency | Confidence | Applicability domain (AD)             | Probability Map                                                                      |
|-----------|----------------------|------------|---------------------------------------|--------------------------------------------------------------------------------------|
| <b>A7</b> | Non-cardiotoxic (-)  | 50%        | No<br>(Value= 0.23 and limit = 0.26 ) | 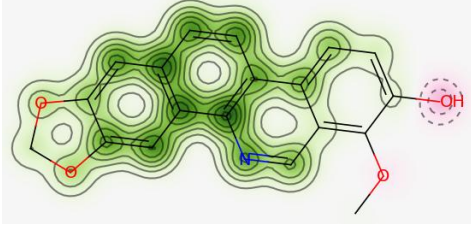 |
| <b>T3</b> | Non-cardiotoxic (-)  | 50%        | No<br>(Value= 0.19 and limit = 0.26 ) |  |

|            |                                                                 |                |                                       |                                                                                      |
|------------|-----------------------------------------------------------------|----------------|---------------------------------------|--------------------------------------------------------------------------------------|
| <b>T14</b> | <b>Weak or Moderate</b><br><br><b>Potential cardiotoxic (+)</b> | 60%<br><br>50% | No<br>(Value= 0.22 and limit = 0.60 ) | 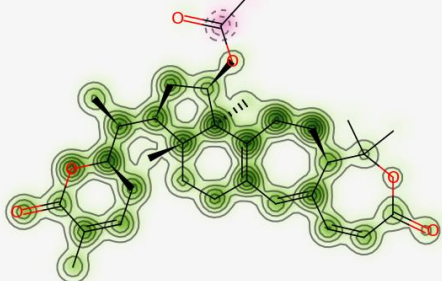   |
| <b>T1</b>  | Non-cardiotoxic (-)                                             | 50%            | No<br>(Value= 0.19 and limit = 0.26 ) |    |
| <b>T2</b>  | Non-cardiotoxic (-)                                             | 50%            | No<br>(Value= 0.19 and limit = 0.26 ) |   |
| <b>T4</b>  | Non-cardiotoxic (-)                                             | 50%            | No<br>(Value= 0.19 and limit = 0.26 ) |  |
| <b>T10</b> | <b>Weak or Moderate</b><br><br><b>Potential cardiotoxic (+)</b> | 60%<br><br>50% | No<br>(Value= 0.25 and limit = 0.26 ) |  |

|            |                                                                 |                |                                       |                                                                                    |
|------------|-----------------------------------------------------------------|----------------|---------------------------------------|------------------------------------------------------------------------------------|
| <b>T16</b> | <b>Weak or Moderate</b><br><br><b>Potential cardiotoxic (+)</b> | 60%<br><br>50% | No<br>(Value= 0.21 and limit = 0.26 ) | 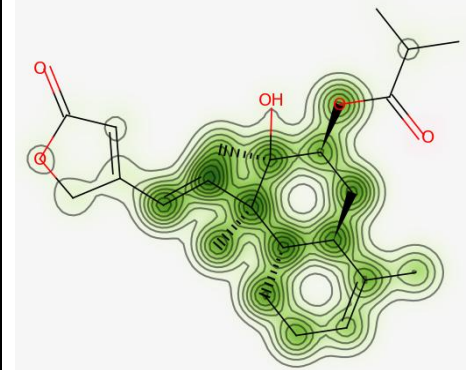 |
|------------|-----------------------------------------------------------------|----------------|---------------------------------------|------------------------------------------------------------------------------------|

**Table S5:** Predicted data of toxicity of NPs compounds<sup>6</sup>

|                                                               | <b>A7</b> | <b>T3</b> | <b>T14</b> | <b>T1</b> | <b>T2</b> | <b>T4</b> | <b>T10</b> | <b>T16</b> |
|---------------------------------------------------------------|-----------|-----------|------------|-----------|-----------|-----------|------------|------------|
| Predicted LD50: mg/kg                                         | 778       | 10000     | 55         | 10000     | 10000     | 10000     | 6000       | 55         |
| Predicted Toxicity Class:                                     | 4         | 6         | 3          | 6         | 6         | 6         | 6          | 3          |
| Average similarity                                            | 80.07     | 64.92     | 59.66      | 64.92     | 64.92     | 64.92     | 65.49      | 67.09      |
| Prediction accuracy: %                                        | 70.97     | 68.07     | 63.38      | 68.07     | 68.07     | 68.07     | 68.07      | 68.07      |
| <b>Organ toxicity</b>                                         |           |           |            |           |           |           |            |            |
| Hepatotoxicity (Probability)                                  | 0.60      | 0.68      | 0.80       | 0.68      | 0.68      | 0.68      | 0.79       | 0.84       |
| <b>Toxicity end points</b>                                    |           |           |            |           |           |           |            |            |
| Carcinogenicity                                               | 0.60      | 0.54      | 0.50       | 0.54      | 0.54      | 0.54      | 0.54       | 0.57       |
| Immunotoxicity                                                | 0.99      | 0.99      | 0.99       | 0.99      | 0.99      | 0.99      | 0.99       | 0.98       |
| Mutagenicity                                                  | 0.75      | 0.65      | 0.92       | 0.65      | 0.65      | 0.65      | 0.91       | 0.82       |
| Cytotoxicity                                                  | 0.60      | 0.57      | 0.67       | 0.57      | 0.57      | 0.57      | 0.86       | 0.71       |
| <b>Tox21-Nuclear receptor signalling pathways</b>             |           |           |            |           |           |           |            |            |
| Aryl hydrocarbon Receptor (AhR)                               | 0.68      | 0.96      | 0.98       | 0.96      | 0.96      | 0.96      | 0.98       | 0.98       |
| Androgen Receptor (AR)                                        | 0.96      | 0.96      | 0.58       | 0.96      | 0.96      | 0.96      | 0.67       | 0.60       |
| Androgen Receptor Ligand Binding Domain (AR-LBD)              | 0.91      | 0.97      | 0.64       | 0.97      | 0.97      | 0.97      | 0.72       | 0.61       |
| Aromatase                                                     | 0.89      | 0.87      | 0.63       | 0.87      | 0.87      | 0.87      | 0.89       | 0.69       |
| Estrogen Receptor Alpha (ER)                                  | 0.91      | 0.88      | 0.57       | 0.88      | 0.88      | 0.88      | 0.74       | 0.58       |
| Estrogen Receptor Ligand Binding Domain (ER-LBD)              | 0.90      | 0.93      | 0.70       | 0.93      | 0.93      | 0.93      | 0.90       | 0.97       |
| Peroxisome Proliferator Activated Receptor Gamma (PPAR-Gamma) | 0.96      | 0.94      | 0.97       | 0.94      | 0.94      | 0.94      | 0.96       | 0.92       |

| <b>Tox21-Stress response pathways</b>                                                 |      |      |      |      |      |      |      |      |
|---------------------------------------------------------------------------------------|------|------|------|------|------|------|------|------|
| Nuclear factor (erythroid-derived 2)-like 2/antioxidant responsive element (nrf2/ARE) | 0.59 | 0.90 | 0.95 | 0.90 | 0.90 | 0.90 | 0.56 | 0.90 |
| Heat shock factor response element (HSE)                                              | 0.59 | 0.90 | 0.95 | 0.90 | 0.90 | 0.90 | 0.56 | 0.90 |
| Mitochondrial Membrane Potential (MMP)                                                | 0.55 | 0.84 | 0.69 | 0.84 | 0.84 | 0.84 | 0.64 | 0.59 |
| Phosphoprotein (Tumor Suppressor) p53                                                 | 0.81 | 0.81 | 0.93 | 0.81 | 0.81 | 0.81 | 0.92 | 0.81 |
| ATPase family AAA domain containing protein 5 (ATAD5)                                 | 0.87 | 0.94 | 0.94 | 0.94 | 0.94 | 0.94 | 0.94 | 0.94 |
|                                                                                       |      |      |      |      |      |      |      |      |
| Toxicity Target                                                                       | --   | --   | --   | --   | --   | --   | --   | --   |
| <b>Weak Active, Strong Active, Weak Inactive, Strong Inactive</b>                     |      |      |      |      |      |      |      |      |

Table S6: Predicted data of toxicity of some FDA approved anti-viral drugs<sup>6</sup>

|                                                  | Rilpivirine | Dolutegravir | Glecaprevir | Grazoprevir | Paritaprevir |
|--------------------------------------------------|-------------|--------------|-------------|-------------|--------------|
| Predicted LD50: mg/kg                            | 2450        | 1600         | 68          | 68          | 200          |
| Prediction accuracy: %                           | 67.38       | 54.26        | 23          | 54.26       | 54.26        |
| <b>Organ Toxicity</b>                            |             |              |             |             |              |
| Hepatotoxicity (Probability)                     | 0.55        | 0.76         | 0.56        | 0.59        | 0.51         |
| <b>Toxicity end points</b>                       |             |              |             |             |              |
| Carcinogenicity                                  | 0.69        | 0.62         | 0.58        | 0.58        | 0.63         |
| Immunotoxicity                                   | 0.94        | 0.98         | 0.96        | 0.99        | 0.99         |
| Mutagenicity                                     | 0.60        | 0.56         | 0.64        | 0.62        | 0.63         |
| Cytotoxicity                                     | 0.76        | 0.62         | 0.50        | 0.54        | 0.54         |
| <b>Nuclear receptor signalling pathways</b>      |             |              |             |             |              |
| Aryl hydrocarbon Receptor (AhR)                  | 0.66        | 0.89         | 0.90        | 0.87        | 0.90         |
| Androgen Receptor (AR)                           | 0.99        | 0.94         | 0.94        | 0.92        | 0.95         |
| Androgen Receptor Ligand Binding Domain (AR-LBD) | 0.98        | 0.97         | 0.91        | 0.93        | 0.93         |
| Aromatase                                        | 0.82        | 0.88         | 0.83        | 0.92        | 0.94         |
| Estrogen Receptor Alpha (ER)                     | 0.61        | 0.84         | 0.87        | 0.88        | 0.89         |



|                                                                                       |      |      |      |      |      |
|---------------------------------------------------------------------------------------|------|------|------|------|------|
| Estrogen Receptor Ligand Binding Domain (ER-LBD)                                      | 0.95 | 0.95 | 0.95 | 0.97 | 0.97 |
| Peroxisome Proliferator Activated Receptor Gamma (PPAR-Gamma)                         | 0.98 | 0.97 | 0.92 | 0.85 | 0.88 |
| Stress response pathways                                                              |      |      |      |      |      |
| Nuclear factor (erythroid-derived 2)-like 2/antioxidant responsive element (nrf2/ARE) | 0.96 | 0.95 | 0.88 | 0.88 | 0.92 |
| Heat shock factor response element (HSE)                                              | 0.96 | 0.95 | 0.88 | 0.88 | 0.92 |
| Mitochondrial Membrane Potential (MMP)                                                | 0.81 | 0.76 | 0.62 | 0.61 | 0.73 |
| Phosphoprotein (Tumor Suppressor) p53                                                 | 0.84 | 0.76 | 0.85 | 0.85 | 0.87 |
| ATPase family AAA domain containing protein 5 (ATAD5)                                 | 0.83 | 0.94 | 0.92 | 0.95 | 0.95 |

Weak Active, Strong Active, Weak Inactive, Strong Inactive

1. <https://www.rcsb.org/>
2. Gaussian 09, Revision D.01, M. J. Frisch, G. W. Trucks, H. B. Schlegel, G. E. Scuseria, M. A. Robb, J. R. Cheeseman, G. Scalmani, V. Barone, B. Mennucci, G. A. Petersson, H. Nakatsuji, M. Caricato, X. Li, H. P. Hratchian, A. F. Izmaylov, J. Bloino, G. Zheng, J. L. Sonnenberg, M. Hada, M. Ehara, K. Toyota, R. Fukuda, J. Hasegawa, M. Ishida, T. Nakajima, Y. Honda, O. Kitao, H. Nakai, T. Vreven, J. A. Montgomery, Jr., J. E. Peralta, F. Ogliaro, M. Bearpark, J. J. Heyd, E. Brothers, K. N. Kudin, V. N. Staroverov, R. Kobayashi, J. Normand, K. Raghavachari, A. Rendell, J. C. Burant, S. S. Iyengar, J. Tomasi, M. Cossi, N. Rega, J. M. Millam, M. Klene, J. E. Knox, J. B. Cross, V. Bakken, C. Adamo, J. Jaramillo, R. Gomperts, R. E. Stratmann, O. Yazyev, A. J. Austin, R. Cammi, C. Pomelli, J. W. Ochterski, R. L. Martin, K. Morokuma, V. G. Zakrzewski, G. A. Voth, P. Salvador, J. J. Dannenberg, S. Dapprich, A. D. Daniels, Ö. Farkas, J. B. Foresman, J. V. Ortiz, J. Cioslowski, and D. J. Fox, Gaussian, Inc., Wallingford CT, 2009.
3. Sousa; S. F.; Fernandes, P. A.; Ramos, M. J. Protein-ligand docking: current status and future challenges. *Proteins*. **2006**, *65*, 15-26.
4. Daina, A.; Michielin, O.; Zoete, V., SwissADME: a free web tool to evaluate pharmacokinetics, drug-likeness and medicinal chemistry friendliness of small molecules, *Scientific Reports*, **2017**, *7*, 42717
5. <http://predherg.labmol.com.br/>
6. [http://tox.charite.de/protox\\_II/index.php?site=compound\\_input](http://tox.charite.de/protox_II/index.php?site=compound_input)

7. Mishra, P., Günther, S. New insights into the structural dynamics of the kinase JNK3. *Sci Rep* 8, 9435 (2018). <https://doi.org/10.1038/s41598-018-27867-3>
8. Hospital, A., Goñi, J. R., Orozco, M., & Gelpí, J. L. (2015). Molecular dynamics simulations: advances and applications, *Advances and applications in bioinformatics and chemistry : AABC* , 8, 37–47. <https://doi.org/10.2147/AABC.S70333>
